# Supplementary material
Source: PubMed Central journal article supplement (PMC3131999)
Supplement: cdd2010109x1.pdf [file cdd2010109x1.pdf]

Figure S1: Additional electrophysiological data

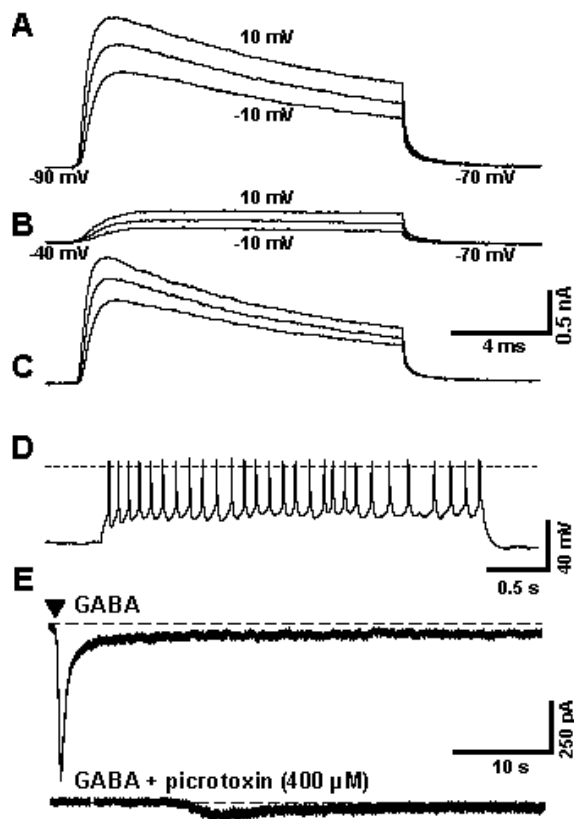

Cells were differentiated on glass cover slips towards the neuronal lineage for 20-24 days and then placed into a temperature controlled recording chamber for whole cell patch-clamp studies. A. Whole cell voltage clamp recording: Overall K<sup>+</sup> currents were pharmacologically isolated from Na<sup>+</sup> currents in the presence of 500 nM tetrodotoxin. The 120 ms cycle involved an initial hyperpolarization phase at -90 mV, a 20 ms ramping step (to -10 mV, 0 mV, 10 mV) and a -70mV repolarization step as indicated. B. A subgroup of K<sup>+</sup> channels with slow activation kinetics and no spontaneous inactivation was triggered, when cells were held at -40 mV before the depolarizing voltage step. C. Mathematical subtraction of B from A indicates another group of K channels with fast activation, and spontaneous inactivation characteristics. The scale bars indicate time and current dimensions for figures A-C. D. Action potentials were evoked by triggering with a defined outward current of 20 pA. The trace indicates the voltage signal obtained in current clamp mode. Data are representative for 10 cells from 2 differentiations. Reversal of the current (-10 pA) showed only passive biophysical membrane properties on the voltage trace. Injection of a smaller current (5 pA) triggered action potentials with lower frequency (in 15 out of 19 cells; not shown). E. Current traces were recorded after stimulation of neurons with GABA in the presence or absence of the specific antagonist picrotoxin. The scale bars represent the current and time dimensions of the experiment. Data are representative for N ≥ 10 neurons (agonists) and n = 3 for antagonists.

Figure S2: Additional data (standard deviations for figure 3)

| Incubation scheme                                                                 | RA                                   | Cyclo                                                            | 3i                                                          |
|-----------------------------------------------------------------------------------|--------------------------------------|------------------------------------------------------------------|-------------------------------------------------------------|
| <b>a</b> Overall effect examined:                                                 | Neuronal diff.(+)                    | Dorsalization                                                    | Neuronal diff. (-)                                          |
|  | Syp : 450± 50                        | Nes : 80± 14<br>Shh : 20± 9                                      | Oct4 : 20± 8<br>Hes5 : 8± 5<br>Nes : 10± 7<br>Tubb3 : 12± 5 |
| <b>b</b> Overall effect examined:                                                 | Neuronal diff.(+)                    | Dorsalization                                                    | N.D.                                                        |
|  | Syp : 2400±250                       | NKx2.1 : 30± 5<br>Dlx1 : 13± 4<br>Shh : 40± 10                   |                                                             |
| <b>c</b> Overall effect examined:                                                 | Caudalization                        | Dorsalization                                                    | Neuronal diff. (-)                                          |
|  | HoxA6 : 840k± 3k<br>HB9 : 760± 80    | Syp : 92± 13<br>Vglut1 : 106± 25<br>Gad2 : 57± 47<br>Shh : 40± 7 | Oct4 : 130± 4<br>Hes5 : 0± 1<br>Nes : 10± 4<br>Syp : 2± 1   |
| <b>d</b> Overall effect examined:                                                 | Caudalization                        | Neurotransmitters                                                | N.D.                                                        |
|  | HoxA6 : 4500±200<br>Isl1 : 39500± 6k | Vglut1 : 150± 40<br>Gad2 : 17± 8                                 |                                                             |

Cultures of mESC were neuronally differentiated for 7, 15 or 20 days as indicated in a-d. They were exposed to retinoic acid (RA), cyclopamine (Cyclo) or 3i for the time periods indicated by the hatched boxes. RNA was isolated at the end of the incubations and used for quantitative RT-PCR analysis of selected differentiation and patterning markers. The data indicate relative expression levels (in %) compared to untreated cultures at the same time point and are means  $\pm$  SD from two to three cultures for each treatment and exposure schedule. Non-significant expression differences with untreated differentiation cultures are indicated by grey shading; Up- and downregulations are color-coded:  $p < 0.05$  (light green, down),  $p < 0.01$  (green, down),  $p < 0.001$  (dark green, down),  $p < 0.05$  (light red, up),  $p < 0.01$  (red, up),  $p < 0.001$  (dark red, up). Headings indicate the overall biological effect, such as accelerated neuronal differentiation (e.g. Neuronal diff. (+)), altered patterning (e.g. Caudalization) or evidence for altered cell composition (e.g. Neurotransmitters or Diff. block). Names are the official gene names, apart from the following: Vglut1 = Slc17a7, Oct4 = Pou5f1, HB9 = Mnx1. N.D.: not determined, as cells did morphologically not differentiate.

### Figure S3: Complete listing of the assignment of genes to the different clusters

The genes are named according to their official NCBI PubMed annotation and can be used without further modification for different bio-informatic analyses, such as testing for overrepresented gene ontologies with g:Profiler (<http://biit.cs.ut.ee/gprofiler/>). Note that the separator (komma, or blank) needs to be adjusted, depending on the software used.

#### Cluster Ia

0610005K03Rik, 0610039J04Rik, 1110002N22Rik, 1110006G06Rik, 1110030K22Rik, 1110033J19Rik, 1190003J15Rik, 1190005I06Rik, 1300013J15Rik, 1500001L15Rik, 1520401A03Rik, 1600021C16Rik, 1700007J06Rik, 1700012H05Rik, 1700013B16Rik, 1700013H19Rik, 1700019D03Rik, 1700019H03Rik, 1700028N11Rik, 1700029P11Rik, 1700071K01Rik, 1810008K03Rik, 1810015A11Rik, 2010001H14Rik, 2010111I01Rik, 2200001I15Rik, 2310003C23Rik, 2310008H09Rik, 2310042N02Rik, 2310045B01Rik, 2310073E15Rik, 2410004A20Rik, 2410004F06Rik, 2410008K03Rik, 2410012C07Rik, 2410018M08Rik, 2410081M15Rik, 2410116G06Rik, 2410127L17Rik, 2600005C20Rik, 2610103J23Rik, 2610305D13Rik, 2700038I16Rik, 2810410M20Rik, 4432409M07Rik, 4632409L19Rik, 4732467B22, 4922503E23Rik, 4930447C04Rik, 4930504E06Rik, 4930539E08Rik, 4930572J05Rik, 4931417G12Rik, 4933405K07Rik, 4933409I22, 4933437F05Rik, 5430425C04Rik, 5730436H21Rik, 5730593N15Rik, 5830436D01Rik, 5830482F20Rik, 5830482G23Rik, 6030457N17Rik, 6330406L22Rik, 6330579B17Rik, 8430410A17Rik, 9030407H20Rik, 9130210N20Rik, 9130422G05Rik, 9630015D15Rik, 9630033F20Rik, 9630048M01Rik, A230050P20Rik, A730016F12Rik, A830080D01Rik, A930010I20Rik, A930014K01Rik, Abi3, Acadm, Acate2, Acate3, Acox1, Acrbp, Acsl1, Ada, Adam23, AI256711, AI427138, AI467606, AI747699, AI847670, Aim2, Aire, AK122209, Akap1, Aldh3a1, Aldh3b1, Alox12, Alox5ap, Amhr2, Ampd1, Angptl4, Ankrd25, Ankrd47, Aoah, Apobec3, Arc, Arhgap30, Arntl, Ase1, Ash2l, Asna1, Atic, Atp10a, Atp6v1c1, Atxn3, AU018091, AU023871, Aven, Avpi1, AW061290, AW491445, AY078069, B3gnt7, BC013481, BC038822, BC060631, BC067068, BC088983, BC099439, Beas1, Beas3, Beat2, Bcl3, Bcl6b, Bid, Bnc2, Bnpl, Bpnt1, Bspry, Bteb1, C030039L03Rik, C030048B08Rik, C230052I12Rik, C330003B14Rik, C330016O10Rik, C330023M02Rik, C430004E15Rik, C730015A04Rik, C77032, C80913, C87860, Calca, Calml4, Camk1d, Cbr3, Cbx7, Cern4, Cd6, Cdc3711, Cdc5l, Cdh1, Cdh3, Cdkl2, Cds1, Cdsn, Cdyl, Cdcam1, Centa1, Centb1, Chchd4, Chek2, Chra9, Chtf18, Clca4, Clcnka, Clcnkb, Clpp, Clps, Clra, Clstn3, Cltb, Cobl, Coch, Cog8, Cox11, Crif3, Cth, Cul4b, Cyb561, Cyc1, D030070L09Rik, D11Ert4636e, D14Ert4668e, D15Mgi27, D1Pas1, D230005D02Rik, D4Bwg1540e, D4Ert422e, D5Bwg0834e, D630023F18Rik, D6Wsu176e, D8Ert4812e, D9Ert4280e, Dapp1, Ddc, Ddx27, Ddx4, Ddx49, Ddx58, Def6, Depdc6, Dhps, Dhrs10, Dhx16, Diap1, Dlc1, Dnaj3, Dnajc6, Dnd1, Dnm13, Dppa3, Dppa4, Dus3, E130012A19Rik, E130014J05Rik, E130016E03Rik, E430034L04Rik, Ebaf, Eed, EN436240, Eif4ebp1, Ell3, Enah, Enpp4, Epb4.9, Epha2, Eras, Esco2, Esrrb, Etsrp71, Etv4, Etv5, Exosc5, Farsb, Fblim1, Fbxo15, Fbxo31, Fcgr2b, Fetub, Fgf1, Fgf17, Fgf4, Fiz1, Fkbp11, Fnbp1, Foxh1, Foxp1, Fpfs, Frs1, G22p1, Gab1, Gabpa, Gclm, Gcnt2, Gdf3, Gfod1, Gfpt2, Gjb4, Glox1, Gls2, Glt28d1, Glud1, Gm1070, Gm128, Gm129, Gm1631, Gm1967, Gna14, Gnat1, Gngt2, Gnmt, Gnnda1, Got1, Gpr114, Gps1, Gpx2, Grhl3, Grtp1, Gsta4, Gtf2h1, Hars2, Hcph, Helb, Hirip5, Hist1h2ae, Hist1h2bf, Hist1h2bh, Hist1h2bk, Hist1h3a, Hist1h3b, Hist1h3e, Hist1h4j, Hist1h4k, Hist1h4m, Hk2, Hmgb211, Hmox1, Hook2, Hormad2, Hprt, Hr, Hsd17b1, Hspa9, Hspbp1, Hspca, Ide, Ifitm1, Ifitm2, Ifrd2, Igfals, Il17d, Il23a, Il27ra, Ildr1, Impa2, Inhbb, Irak3, Irf1, Isyna1, Itgae, Itgb7, Itpk1, Jak3, Jmjd1a, Jmjd2c, Kcnk5, Klf2, Klf5, Klf8, Krt1-17, Krt42, Lt1d1, L3mbtl2, Lad1, Laptm5, Lck, Leftb, Liph, LOC214531, LOC217066, LOC229665, LOC233038, LOC234374, LOC245128, LOC381411, LOC433801, LOC434197, LOC435970, LOC545471, LOC627585, LOC630579, LOC634428, Lrch4, Lrmp, Lrrc34, Ltbp4, Ly6g6c, Ly6g6d, Ly75, Manba, MAp19, Mapkapk3, Mblcd1, Mcl1, Mef2b, Mfap5, Mfc, MGC117846, Mia1, Mif4gd, Mlh3, Morc3, Mov10, Mras, Mrpl1, Mrpl40, Mrps18b, Mrps31, Mrps5, Ms4a6d, Msc, Msh6, Msrb2, Mtap7, Mtf2, Mthfd1, Mtss1, Mtsu1, Mybl2, Myc, Mylpf, Myof, Myo1g, Myst4, Napsa, Nefh, Niban, Nlrp14, Noc4, Nol1, Nol6, Nos3, Nos3as, Notch4, Nqo3a2, Nr0b1, Nr1d2, Nr5a2, Nrp2, Nubp2, Oas2, Olfr985, Orc11, Orc5l, ORF21, Osm, OTTMUSG0000010673, Ovol1, Parp14, Pcaf, Pcdh21, Pcolce2, Pcyt1b, Pdcd2, Pde4dip, Pdhb, Pdk1, Pdyn, Pecam1, Pfc, Pfkp, Pgc, Phc1, Phf17, Phlda2, Pigl, Pip3ap, Pitpnc1, Pla2g1b, Plcg2, Plekha4, Plekhf2, Plekhg5, Pml, Pnma2, Poli, Polr2e, Pou5f1, Ppan, Ppm1b, Prdm1, Prps1, Prx, Psmb10, Ptpb1, Ptk9l, Pwp2, Pycard, Rab25, Rab27a, Rabgga, Rad9b, Raet1b, Ralbp1, Rapsn, Rarg, Rasal1, Rasgr2, Rasipl, Rbm13, Rbm35a, Rbp7, Rbpms, Rfx2, Rhebl1, Rmnd5b, Rnf125, Rnf138, Rnf17, Rnu3ip2, Rpl4, Rpp25, Rps6ka1, Rps6kl1, Sall1, Sall4, Sema4a, Sema4b, Sephs2, Sept1, Serpinb6c, Setd6, Sgk, Sgk2, Sgk3, Sh3g2, Shmt1, Si, Sip1, Six1, Skap2, Skil, Slc11a1, Slc23a2, Slc25a12, Slc25a26, Slc27a2, Slc28a1, Slc35f2, Slc37a1, Slc7a3, Slc7a7, Smpdl3b, Snai3, Sntb2, Soes2, Soes3, Sod2, Sox2, Spats1, Spc24, Spnb4, Spp1, Spry4, Srm, St6galnac2, Stac2, Stat4, Steap, Stk31, Syt9, Tada2l, Taf5l, Taf7, Tbc1d10c, Tbc1d15, Tcea3, Tcf15, Tcfcp2l2, Tcfcp2l3, Tcf5, Tdglf1, Tdh, Tek, Tek1, Tex10, Tex11, Tex14, Tex19, Tfpi, Tgm1, Timp1, Tjp2, Tm4sf3, Tm4sf5, Tmc6, Tmem54, Tmem8, Tmprss13, Tmsb10, Tnlp1, Tomm34, Tor3a, Tpd52, Trap1, Trib3, Trim28, Triml1, Trip12, Trp53, Tsga2, Tst, Ttc29, Tuba4, Tuba6, Ubash3a, Ubf, Ubx4, Ung, Upk1a, Upk2, Upp1, Usp28, Usp7, Utf1, Vangl1, Vwf, Was, Wdr20, Wdr31, Yrdc, ZBTB45, Zfp259, Zfp296, Zfp371, Zfp42, Zfp459, Zfp473, Zfp52, Zfp57, Zfp97, Zic3, Zp3, Zscan10, Zswim1

#### Cluster Ib

0610007P06Rik, 0610009E20Rik, 0610041E09Rik, 0910001A06Rik, 1110001A07Rik, 1110001A12Rik, 1110002E23Rik, 1110005A23Rik, 1110007A13Rik, 1110007C24Rik, 1110032N12Rik, 1110064P04Rik, 1110067D22Rik, 1200003I07Rik, 1200006O19Rik, 1200008G12Rik, 1200009B18Rik, 1200011O22Rik, 1200016B10Rik, 1300001H01Rik, 1300018L09Rik, 1500001M20Rik, 1500016H10Rik, 1700012G19Rik, 1700022C21Rik, 1700023O11Rik, 1700034H14Rik, 1700065O13Rik, 1810003N24Rik, 1810007M14Rik, 1810008O21Rik, 1810014F10Rik, 1810014L12Rik, 1810035L17Rik, 1810044O22Rik, 1810055E12Rik, 2010003J03Rik, 2010316F05Rik, 2310003F16Rik, 2310010B21Rik, 2310031L18Rik, 2310036O22Rik, 2310037I24Rik, 2310042G06Rik, 2310044G17Rik, 2310047C04Rik, 2310050B20Rik, 2310056P07Rik, 2310061F22Rik, 2310061I09Rik, 2310066N05Rik, 2310079N02Rik, 2410002O22Rik, 2410004L22Rik, 2410005K20Rik, 2410015N17Rik, 2410016F19Rik, 2410017P07Rik, 2410042D21Rik, 2410080P20Rik, 2410118I19Rik, 2510005D08Rik, 2510012J08Rik, 2600001B17Rik, 2600001J17Rik, 2600005O03Rik, 2600013N14Rik, 2610012O22Rik, 2610016F04Rik, 2610019N13Rik, 2610020C11Rik, 2610020N02Rik, 2610020O08Rik, 2610028L19Rik, 2610029G23Rik, 2610029K21Rik, 2610033H07Rik, 2610034N24Rik, 2610040E16Rik, 2610042L04Rik, 2610044O15Rik, 2610101N10Rik, 2610207I05Rik, 2610312B22Rik, 2610318I01Rik, 2610318N02Rik, 2610510J17Rik, 2610511O17Rik, 2610528A15Rik, 2610528E23Rik, 2610528H13Rik, 2610528M18Rik, 2700007P21Rik, 2700050L05Rik, 2700050P07Rik, 2700085M18Rik, 2700094F01Rik, 2700097O09Rik, 2810004A10Rik, 2810004N23Rik, 2810008M24Rik, 2810021B07Rik, 2810028N01Rik, 2810036L13Rik, 2810037C03Rik, 2810047L02Rik, 2810422B04Rik, 2810428I15Rik, 2810430M08Rik, 2810457M08Rik, 2810485I05Rik, 2900001O04Rik, 2900057D21Rik, 3110002L15Rik, 3110010F15Rik, 3110082I17Rik, 3200002M19Rik, 3300001M20Rik, 3300001P08Rik, 3732409C05Rik, 4122402O22Rik, 4632417K18Rik, 4732465J09Rik, 4732497O03Rik, 4833424P18Rik, 4921505C17Rik, 4921524P20Rik, 4921537D05Rik, 4930427A07Rik, 4930432B04Rik, 4930453N24Rik, 4930485D02Rik, 4930519N13Rik, 4930542G03Rik, 4930547N16Rik, 4930562C03Rik, 4931400A14Rik, 4931407G18Rik, 4931431L11Rik, 4932441K18Rik, 4933403G14Rik, 4933411K20Rik, 4933424A10Rik, 4933424M23Rik, 4933424N09Rik, 4933435A13Rik,

5430400N05Rik, 5430438H03Rik, 5730466H23Rik, 5730555F13Rik, 5730599I05Rik, 5830411K18Rik, 5830416A07Rik, 5830426I05Rik, 5832424M12, 6230416J20Rik, 6330503K22Rik, 6330534C20Rik, 6430601A21Rik, 6530405K19, 6720458F09Rik, 6720485C15Rik, 6820449I09Rik, 7420416P09Rik, 8430423A01Rik, 9030612M13Rik, 9330134C04Rik, 9430010O03Rik, 9430034D17Rik, 9830124H08Rik, A030012M09Rik, A730024A03Rik, A730098D12Rik, A930009M04Rik, AA408296, AA408556, Aars, Aarsd1, Aatf, AB041544, Abce1, Abcf2, Abi2, Acac, Acly, Aca47, Acsl5, Actb, Actl6a, Actn3, Actr, Adat1, Adk, Adprtl2, Adsl, Adss, AF233884, Aftph, Agps, Ahsa1, A1326906, A1449175, A1449441, A1838661, AK122525, Akap12, Akap6, Akp19, Akrlb3, Amd2, Anapc5, Ankrd10, Anln, Anp32a, Anp32e, Aoc3, Ap3m1, Aplitd1, Appbp1, Aprin, Aqr, Ardl, Arhgap12, Arl6ip2, Armc6, Armc8, Armcx1, Arpp19, Ars2, Asf1a, Asf1b, Aspscr1, Atad1, Atad2, Atad3a, Atf2, Atf4, Atic, Atm, Atp13a1, Atp5g1, Atrx, Attp, Atxn3, AU021838, AW011752, AW046396, AW060766, AW540478, AW549877, AW550801, AW555814, Axot, B020018G12Rik, B130055D15Rik, B230219D22Rik, Bag4, Banf1, Bbs5, BC002199, BC003885, BC003993, BC004701, BC006705, BC008103, BC016226, BC018399, BC018601, BC025462, BC027061, BC027231, BC030867, BC033596, BC048355, BC049806, BC050092, BC055324, BC062951, BC085271, Bcap37, Beas2, Bccip, Bckdhh, Bclaf1, Bhlhb9, Bing4, Birc2, Birc5, Blm, Bms11, Bok, Bop1, Bpntl1, Brcal, Brea2, Brip1, Brp16, Brwd1, Btbd14b, Bub1b, Bxdcl1, Bxdc2, Bzw1, Bzw2, C1qbp, C230052I12Rik, C330005L02Rik, C330017I15Rik, C330018L13Rik, C6.1A, C77032, C78212, C79407, C86302, C920006C10Rik, Cacybp, Calmbp1, Catnal1, Cbfb, Cbr3, Cbx5, Ccar1, Ccdc111, Ccdc132, Ccdc58, Ccm1, Ccnb1, Ccnc, Ccne1, Cne2, Cenf, Cet3, Cct6a, Cet7, Cct8, Cdc14b, Cdc20, Cdc212, Cdc451, Cdc6, Cdc7, Cdea2, Cdea3, Cdea5, Cdea7, Cdk2, Cdk2ap1, Cdkal1, Cenph, Cenpi, Cenpj, Cenpp, Cetn3, Cfdp1, Cggbp1, Chaf1a, Chaf1b, Chcl1, Chd1, Chd11, Chek1, Chek2, Cherp, Chic1, Chordc1, Chuk, Ciapin1, Cln3, Clk1, Clk4, Clns1a, Clock, Clspn, Cnot10, Cnot2, Cnot4, Cnot7, Cops2, Cops3, Cox10, Cpsf6, Crbn, Crk, Crsp7, Crsp9, Csd4, Csd1, Cse11, Cspg6, Cstf2, Cstf3, Ctf, Ctdp1, Ctdspl2, Ctps, Cugbp1, Cul1, Cul5, Cwf1912, Cyb5r4, Cysc, Cylid, D0H8S2298E, D10627, D10Erdt322e, D130060C09Rik, D16Bwg1547e, D16Erdt472e, D19Bwg1357e, D19Erdt678e, D19Erdt703e, D1Wsu40e, D3Erdt194e, D4Wsu114e, D5Erdt689e, D7Rp2e, D8Erdt457e, Dars, Dbf4, Dbr1, Dbt, Dctd, Dcun1d4, Ddx1, Ddx18, Ddx20, Ddx21, Ddx3x, Ddx3y, Ddx46, Ddx48, Ddx50, Ddx51, Ddx52, Ddx54, Dek, Denr, Depdc1b, Dhodh, Dhx15, Dhx36, Dhx38, Dhx9, Diap3, Dicer1, Dido1, Dlg7, Dmtf1, Dnaja2, Dnajb1, Dnajc10, Dnajc2, Dnajc7, Dnajc8, Dnm11, Dnm12, Dnm3b, Dok2, Dph2, Dpp3, Drbp1, Drg1, Dscr2, Dutc, E230015L20Rik, E2f2, E2f4, E430004F17Rik, E430028B21Rik, E430034L04Rik, Ebna1bp2, Ecd, Ecsit, Edd1, Eef1d, Eef1e1, Eftud2, EG433923, Ehmt1, Eif1a, Eif2b1, Eif2s2, Eif2s3y, Eif3s10, Eif3s4, Eif3s6ip, Eif3s7, Eif3s8, Eif3s9, Eif4g2, Eif5, Eif5a, Elac2, Elavl1, Elavl2, Elmo1, Elov16, Elys, Eno1, Epc2, Eprs, Erh, Erich1, Esp11, Etf1, Evi5, Exo1, Exosc1, Exosc2, Exosc6, Exosc7, Ezh2, F630043A04Rik, F730047E07Rik, Fancd2, Fancf, Farsb, Fbl, Fbxo30, Fbxo33, Fbxo8, Fcmd, Fen1, Fgfr1op, Fign1, Fkbp4, Fkbp5, Fmpip, Fnbp3, Fnpl1, Fnta, Fntb, Foxred1, Ftsj3, Fubp3, Fundc1, Fusp11, G22p1, G3bp, G3bp2, G430022H21Rik, G6pdx, Gabpa, Gars, Gart, Gbx2, Gca, Gcc2, Gcn5l2, Gemin4, Gemin5, Gemin6, Gga3, Gk5, Glde, Gm83, Gnl3, Golga4, Gpbb1, Gpd2, Gpiap1, Gprk6, Gps1, Gpt2, Grc2f, Grwd1, Gsg2, Gsp11, Gtf2e2, Gtf2h2, Gtf3c2, Gtf3c3, Gtpbb1, Gtpbb4, Gtsel, Guk1, H2afz, Hapln4, Heccs, Hcfc1, Hdac1, Hdgf, Hdllb, Heatr1, Heatr3, Herc4, Hist1h2ab, Hist1h2ad, Hist1h2ag, Hist1h3c, Hist1h3h, Hist1h4f, Hmga1, Hmgb2, Hn11, Hnrpa1, Hnrpa2b1, Hnrpd1, Hnrpf, Hnrph1, Hnrpk, Hnrpm, Hnrpu, Homer1, Hsp3, Hrb2, Hsd3b2, Hsp105, Hspa4, Hspcb, Hspd1, Htatsf1, Hus1, Iars, Iltk, Igf2bp1, Impact, Incenp, Ipmk, Iqgap2, Ireb2, Irgm, Isg20l2, Isy1, Itgb4bp, Ivns1abp, Jam2, Josd3, Jtv1, Kars, Kbtbd8, Kif11, Kif15, Kif18a, Kif22, Kif23, Kif4, Klhdc4, Kntc1, Kpna1, Kpna2, Kpna3, Kpnb1, Kpnb3, Kras2, Lama1, Lars, Lbr, Ldh1, Leol1, Lgtn, Lig1, Lin28, Lin54, Lin7c, Lmnb2, LOC211660, LOC216443, LOC237877, LOC329575, LOC380625, LOC381795, LOC382010, LOC432879, LOC433182, LOC434858, LOC639396, Lrpprc, Lsm4, Lsm6, Lyar, Lypla1, Lyrnm1, Lyrnm2, Mad2l1, Map2k3, Map3k7ip3, Mars, Mat2a, Mat2b, Matr3, Mbd3, Mbip, Mbd11, Mbtps2, Mcm10, Mcm2, Mcm3, Mcm4, Mcm5, Mcm6, Mcm7, Mcph1, Mdn1, Me2, Med18, Melk, Mettl2, Mettl3, Mfap1b, Mgea6, Mier1, Mina, Mki67ip, Mme, Mnd1, Mns1, Mphosph6, Mre11a, Mrpl10, Mrpl12, Mrpl15, Mrpl18, Mrpl20, Mrpl35, Mrpl36, Mrpl37, Mrpl45, Mrpl49, Mrpl50, Mrps25, Mrps26, Mrps31, Mrps7, Ms4a10, Msh2, Msh3, Mt1, Mtbp, MTERF, Mthfd2, Mto1, Mtrf1, Mtx1, Mum1, Mutyh, Mybbp1a, Myef2, Myg1, Mysml1, Nap1l1, Narg1, Narg11, Narg2, Nars, Nasp, Ncapth2, Ncbp2, Ncl, Ncoa6ip, Ncor1, Ndc80, Nde1, Nedd1, Nfat5, Nfatc3, Nfyb, Nfyc, Nip7, Nipbl, Nipsnap1, Nle1, Nlk, Nmel1, Nmt1, Nob1, Noll1, Noll10, Noll11, Nol5, Nol5a, Nola1, Nola2, Nola3, Npm3, Nqo1, Nsbp1, Nsd1, Nsf, Nsun2, Nsun5, Nubp1, Nudc, Nudcd3, Nudc-ps1, Nup107, Nup133, Nup155, Nup160, Nup43, Nup54, Nup62, Nup85, Nup88, Nup93, Nusap1, Nutf2, Nvl, Odc1, Ogt, Oprs1, Orc6l, Oxrl1, Pa2g4, Paf53, Pafah1b1, Pank1, Papola, Papolg, Park7, Parl, Parp1, Pcf11, Pcdcl10, Pdcl, Pdha1, Pdss1, Pes1, Pex13, Pfk1, Pfn1, Pgam1, Pgd, Phf5a, Phtf2, Piga, Pinx1, Pipox, Pir, Pitpnb, Pkm2, Plaa, Plk1, Plk4, Plp, Pmm2, Pnc1, Pola2, Pold1, Pold2, Pold3, Poldip2, Pole, Polr3b, Polr3g, Polr3k, Pop1, Pou2f1, Ppa1, Pparbp, Ppat, Ppid, Ppm1g, Ppp1cb, Ppp1cc, Ppp1r9a, Ppp2r5c, Ppp4r1, Prkdc, Prkr, Prkwnk1, Prmt3, Prmt5, Prmt6, Prodh, Prosc, Prpf3, Prpf38b, Prpf39, Prpf8, Prps2, Psat1, Psp1, Psmb3, Psmc2, Psmc3ip, Psmc4, Psmc5, Psm11, Psm12, Psm14, Psm17, Psm3e, Psm4e, Pso1c2, Ptbp1, Ptpn12, Ptpkr, Pum2, Pus3, Pvr13, Pwp2, Pycr2, Qdpr, Qprt, Rab5a, Rad17, Rad23a, Rad50, Rad51, Rad51c, Rad54l, Rai14, Ranbp1, Ranbp2, Rangrnf, Rapgef6, Rars, Rarsl, Rasal, Rbbp7, Rbm13, Rbm19, Rbm21, Rbm26, Rbm28, Rbm3, Rbm6, Rcl1, Reccl1, Recql4, Rent1, Rev3l, Rfc2, Rfc3, Rfc5, Rfwd3, Rfx1, Rg9mtd1, Rg9mtd2, Ric3, Rif1, Ris2, Rnasen, Rnf134, Rnf138, Rnf139, Rnf44, Rnf6, Rngtt, Rnmt, Rpa1, Rpa2, Rpap1, Rprg, Rpl23, Rpl29, Rpl30, Rpo1-4, Rpo2tc1, Rps27a, Kragb, Rrm1, Rrm2, Rrm2b, Rrn3, Rsf1, Rsrc2, Ruvbl1, Ruvbl2, Ryk, Sacm11, Sall1, Sall4, Sap30, Sars2, Sart3, Sbnol1, Scoc, Sdad1, Sdcccag1, Sehl1, Sennp8, Sept2, Serbp1, Sf3a1, Sf3a3, Sf3b3, Sf4, Sfpq, Sfrs1, Sfrs2, Sfrs3, Sfrs6, Sfrs7, Sgoll1, Sh3d1b, Schcpl1, Shmt2, Shprh, Siah1b, Sirt1, Sirt6, Skb1, Skp1a, Skp2, Slc11a1, Slc12a2, Slc20a2, Slc25a15, Slc25a38, Slc25a5, Slc38a2, Slc6a15, Slc7a5, Slc7a6, Smarcd1, Smarcc1, Smc1a, Smc5l1, Smc6l1, Smek1, Smek2, Smin, Smm1, Smyd5, Snap23, Snrpa, Snrpa1, Snrpd1, Snx10, Solt, Spag5, Spc24, Spcs3, Spg7, Srfbp1, Srl, Srp19, Srp54, Ss18, Sssca1, Stag1, Stag2, Stc2, Stip1, Stk2, Stk3, Stk6, Styx, Suhw3, Suhw4, Sult4a1, Supv311, Suz12, Syap1, Sybl1, Syncrip, Taf13, Taf15, Tarbp2, Tardbp, Tars, Tax1bp1, Tbc1d23, Tbrg4, Tcerg1, Tcof1, Tebp, Tex10, Tex292, Tex9, Tfam, Tfb2m, Tfdp1, Tfrc, Thg11, Thoc1, Thoc4, Thop1, Thumpd3, Tiam1, Timeless, Timm8a1, Tipin, Tk1, Tle4, Tlk1, Tmem126a, Tmem20, Tmod3, Tmpo, Tnrc15, Tom1, Tomm70a, Top1, Top2a, Topors, Tpm3, Tpp2, Tpr, Tpx2, Tra1, Tra2a, Trh, Trim2, Trim23, Trim33, Trp53inp1, Trps1, Tssc1, Ttc35, Ttf2, Ttk, Ttl4, Ttpa, Tubg1, Tufm, Tug1, Twistnb, Tyms, Tyms-ps, U2af1-rs2, Ubp2, Ube1c, Ube1x, Ube2g1, Ube2q2, Ube3a, Ublcp1, Uble1b, Ubp1, Ubtff, Uchl3, Uchl5, Uhrf1, Umps, Upf1, Upf2, Usp1, Usp10, Usp15, Usp16, Utx, Uxt, Vac14, Vars, Vdac3, Vps35, Vps54, Vrk1, Wars, Wdhdl1, Wdr18, Wdr3, Wdr4, Wdr75, Wdr77, Wdr9, Wm, Wsb1, Wwp2, Xab1, Xlr3a, Xlr4a, Xpo4, Yme111, Yod1, Ythdf1, Ythdf3, Zc3hc1, Zc3hdc8, Zcchc3, Zcchc7, Zcchc8, Zcchc9, Zdhhc21, Zfml, Zfp1, Zfp101, Zfp106, Zfp131, Zfp143, Zfp148, Zfp160, Zfp2, Zfp281, Zfp292, Zfp322a, Zfp326, Zfp35, Zfp367, Zfp37, Zfp451, Zfp457, Zfp472, Zfp597, Zfp60, Zfp62, Zfp715, Zfp75, Zfp760, Zfx, Zranb2, Zrf2, Zw10

## Cluster IIa

1110001C20Rik, 1110025F24Rik, 1300018P11Rik, 1500010M16Rik, 2010003O18Rik, 2210018M03Rik, 2210407G14Rik, 2310002B06Rik, 2310047D13Rik, 2310047I15Rik, 2310057H16Rik, 2410127E18Rik, 2600005N12Rik, 2600011E07Rik, 2610034M16Rik, 2700006G02Rik, 2810030E01Rik, 2810417H13Rik, 2810439F02Rik, 4121402D02Rik, 4921506I22Rik, 4930432O21Rik, 4930471O16Rik, 4932409F11Rik, 5033414D02Rik, 5530601I19Rik, 5730466C23Rik, 5930416I19Rik, 6030443O07Rik, 6330415F13Rik, 6330505F04Rik, 6430510M02Rik, 6720425G15Rik, 6720460F02Rik, 6720463E02Rik, 8430410K20Rik, 8430415E04Rik, 8430438D04Rik, A430106J12Rik, Aacs, Acat2, Acsl4, Acsl6, Actg2, Adamts7, Adarb1, Agr1a, Agr11, AI314180, AK129302, Aldh1a7, Ap2b1, Arf2, Arid3b, Arl2bp, Armcx2, Armcx3, Asb13, AU040950, AW742319, B130017I01Rik, B230217C12Rik, B3gnt5, B830028P19Rik, B930008K04Rik, B930093C12Rik, Bbs7, BC016198, BC025076, BC026590, BC029103, BC031748, BC043301, Bcl2, Bex2, Bmi1, Bmpr1a, Bmpr1b, C230071H18Rik, C230090D14, C630028C02Rik, Calca, Catnd2, Cbfb, Cblb, Cbx1, Cbx2, Ccnd1, Ccng1, Cdh2, Cdh6, Chrna3, Chst3, Cnksr2, Cp, Cpd, Csnk1g3, Cxadr, D030013I16Rik, D15Bwg0669e, D930028F11Rik, D9Wsu20e, Dcun1d4, Dgkk, Dhcr24, Dhcr7, Dill1, Dnajb4, Dpp8, Drctmnb1a, Dusp18, Dusp4, E130113K22Rik, E2f6, Efnb2, Egr2, Elavl4, Elov12, Elov14, Emilin2, Em15, Epb4.1, Epb4.1l5, Epha7, Epm2aip1, Extl2, Fabb5, Fads1, Fbf1, Fbxo16, Fdps, Fgf13, Fgf5, Fgfr3, Fhl1, Fign, Foxd4, Foxg1, Fst, Fut10,

Fzd2, Fzd3, Fzd7, Gja7, Gli3, Gm1008, Gm347, Gm644, Gm784, Gnaq, Golga1, Golph2, Golph4, Gpr23, Gpsm2, Greb1, Grip1, Gulp1, H19, H1fx, Has2, Hes3, Hip1, Hmgcs1, Hmgn2, Hn1, Hnrph3, Homer1, Hoxa2, Hoxb2, Hp1bp3, Hs2st1, Hsd17b7, Idh1, Ifit2, Ifit81, Igfbp3, Igsf4a, Insig1, Insl6, Isl1, Ivns1abp, Jak2, Jam3, Kcnh2, Khdrbs1, Kif1b, Kif21a, Kif3a, Klhl17, Klhl7, Krt10, Kynu, Lamp2, Lix1, Ligl1, LOC245522, LOC544988, LOC545007, Lor, Lrp12, Lrrig2, Lss, Ltbp1, Lymr2, Manea, Map2k6, Mapk11, Mapk12, Mapk8, Mbnl1, Mecp2, Metrn, Mettl9, Mfng, Mkrn3, Mlf1, Mllt3, Mmp16, Mospd1, Moxd1, Mpdz, Mpp5, Msn, Msx3, Mtap, Mtap1b, Mvd, Myh10, Myk1, Myo5b, Nefm, Nes, Net1, Neurod4, Nin, Nkx2-9, Nr6a1, Nrarp, Nrg1, Nsdhl, Ntrk3, Nudt10, Nudt11, Nup210, Odz3, Ogrf, Onecut2, Opn3, P2ry5, Pank3, Panx1, Pbx3, Pcdh17, Pcdh7, Pcsk9, Peli2, Phf6, Phkb, Pik3r3, Pja2, Plagl2, Plcl2, Pls3, Polk, Ppm1e, Ppm11, Ppnr, Ppp1r1b, Prdx2, Prkar1a, Prkcn, Prkra, Prkrir, Prox1, Prr7, Ptp4a2, Pxmpp3, Rab28, Rab8b, Rabl4, Rala, Rassa2, Rb1, Rbl1, Rbx1, Rcbtb2, Rgs12, Rhobtb3, Rhoe, Rhpnl, Rln1, Rnf144, Rohn, Rsn, Satb1, Sc4mol, Sc5d, Sed2, scl000510.1\_2, Scoc, Scube2, Sdc1, Sdcbp, Sema5b, Sfrp1, Sfrp2, Sgcb, Sh3bgrl, Sh3kbp1, Sh3md2, Siat8c, Slc25a24, Slc2a6, Slc35f1, Slc8a1, Smad5, Smarca1, Smarce1, Smo, Snapc3, Snn, Sox13, Sp8, Spag9, Sqle, Ssr3, St18, St8sia4, Stard4, Stxbp4, Tank, Tceal8, Tceb1, Tcf19, Tcf4, Tdrd3, Tdrkh, Tead2, Tgfr1, Thbs1, Thsd7b, Tial1, Tirap, Tm4sf10, Tmem2, Tmem32, Tmem47, Tmod2, Tph1, Tpm4, Traf3, Traf4, Tro, Trove2, Ttc3, Ttc8, Tuba1a, Twsg1, Ube2e3, Ube2n, Ubt2, Ulk2, Usp47, Vamp3, Vezf1, Waspip, Wdr51b, Wdr6, Wdr68, Wdt3-pending, Yaf2, Ypel1, Zbtb33, Zfhx1b, Zfp238, Zfp3611, Zfp397, Zfp41, Zfp629, Zhx1, Zhx2, Zmynd11, Zswim5

## Cluster IIB

0610009O03Rik, 0610039N19Rik, 1600023A02Rik, 1700011F14Rik, 1700029G01Rik, 1700051E09Rik, 1700083M11Rik, 1810014F10Rik, 2210409E12Rik, 2310004L02Rik, 2310009N05Rik, 2310046K01Rik, 2410080H04Rik, 2410146L05Rik, 2610019F03Rik, 2610033C09Rik, 2610528J11Rik, 2900011O08Rik, 3110043J09Rik, 3830422N12Rik, 4732472I07Rik, 4921530G04Rik, 4930432K21Rik, 4930517K11Rik, 4930569K13Rik, 4930583H14Rik, 4933428G20Rik, 6330530A05Rik, 9130404D14Rik, 9330186A19Rik, A130092J06Rik, A430089I19Rik, Aard, Abcb1b, Acas2l, Acp6, Adam19, Adora2b, Aes, Agpat2, AI428936, AI429613, Akp2, Akt1s1, Aldh2, Aldoa, Aldoc, Alpk3, Amdhd2, Amid, Ankrd38, Ankrd47, Anxa11, Anxa6, Anxa8, Aplm2, Aplp1, Apo2, Apoc1, Apoe, Aqp3, Arhgdib, Arhgef19, Arhgef3, As3mt, Ass1, Atad4, Atp1b1, Atp2a3, AU016977, AU022751, AW049765, Axud1, BC003277, BC004728, BC013481, BC021614, BC022765, BC023754, BC025833, BC051227, Bckdha, Bcl6, Blvrb, Bmp4, C130038G02Rik, C80638, Camk2b, Capg, Capn1, Capn5, Cblc, Cbs, Ccdc3, Cd68, Cd79b, Cd9, Cd97, Cdc42ep3, Chi3l1, Cklfsf4, Ckmt1, Cldn4, Clgn, Cnnm2, Cox7a1, Cox8c, Cpn1, Cpne8, Crtap, Crym, Csad, Csrp2, Cyp2j9, Cyp2s1, D130058I21Rik, D15Erd366e, D2Erd391e, Dact2, Dedd2, Defb42, Dgka, Dhrrs6, Dhrrs8, Dmrtc2, Dpp4, Dpp7, Dscr1l2, Dtx1, E030003N15Rik, Ech1, Echdc2, Efcab4a, Efhdl1, Egfl7, Eglng3, Egr1, Eif4a2, Ela2, Elf3, Elmo3, Emp1, Eng, Epas1, Epp4.9, Ephx1, Ephx2, Eppk1, Ercc2, Esam1, F11r, F2rl1, Fbxo2, Fbxo27, Fbxo6b, Fkbp6, Folr1, Foxa3, Fxyd5, Gadd45a, Galt, Gbp4, Gdf15, Gjb3, Glb1, Glrx, Gm397, Gm817, Gmfg, Gmpr, Gna15, Gnpda1, Gpre5a, Gpx4, Grasp, Grb7, Grn, Gsdmdc1, Gsta3, Gstm1, Gstm2, Gstp2, Gstt2, Gstt3, Gulo, Hagh, Hcn2, Hcph, Hexb, Hist1h2bj, Hsd3b7, Hspb1, Icam1, Idb1, Ier3, Ifi30, Ifitm3, Il28ra, Inpp5d, Irak2, Irf1, Irf6, Isgf3g, Itgb4, Itpka, Itp3r3, Jak3, Jam2, Junb, Kcnk5, Kcnk6, Klf4, Klhl13, Klk1b27, Klk5, Klk6, Lat, Ldhc, Ldoc1, Lgals3, Lgals4, Llglh2, Lmna, Lmo6, LOC223262, LOC380705, LOC433722, LOC435337, LOC548597, LOC625360, LOC626391, LOC639910, Lrpap1, Lu, Ly6a, Ly6g6e, M6prbp1, Map3k6, Mapk13, Mgmt, Mical3, Mkrn1, Mmm2, Mov10, Mov10l1, Mreg, Mta3, Mvp, Myd116, Myd88, Myl7, Nanog, Ndg2, Ndp52, Ndrgr2, Nfatc2ip, Nfe2l2, Nfkbia, Nid2, Nodal, Nos1, Npepl1, Nptx2, Nr1h2, Nrgn, Nupr1, Oas1d, Oas1g, Ostf1, Pascin1, Paox, Pcolce, Pcsk1n, Pde8a, Pdgc, Pdk4, Pdlim1, Pecam1, Pem, Pim3, Pip5k2c, Piwil2, Pkp3, Pla2g10, Plac8, Pleb3, Pled3, Plp2, Pltp, Plxdc1, Pmm1, Pnpla2, Ppfibp2, Ppgb, Ppm1k, Ppp1r13b, Ppp1r14a, Prss19, Prss35, Prune, Ptprv, Pvr, Rad52b, Rage, Rasgrp1, Rassa2, Rbpms, Rbpms2, Rec8L1, Relb, Renbp, Rlbp1, Rnf135, Robo4, Rpl3l, S100a10, S100a6, Sat1, Scarf1, Sdc4, Sdcbp2, Selenbp1, Serpinb6a, Sfn, Sgk3, Sh3tc1, Slc12a8, Slc1a1, Slc22a18, Slc24a6, Slc25a20, Slc29a1, Slc2a3, Slc38a4, Slc39a4, Smcl12, Snta1, Snx3, Soat2, Sorl1, Sox15, Spic, Spint2, Ssbp4, St14, Stag3, Stard8, Stat3, Stat6, Stx3, Stxbp2, Sult2b1, Susd2, Syng1, Syng3, Tbx3, Tcfap2c, Tc11, Testv1, Testv3, Tead4, Tgfb1, Tgif, Timm8a2, Tjp3, Tle6, Tmco4, Tmem23, Tmem38b, Tmie, Tnnt1, Tpd52, Trf, Trim25, Trim47, Tspan17, Tsrc1, Tuba3, Tulp2, Txnip, Ulk1, Vil2, Vkorc1, Wbscr21, Wdr21, Wdr34, Wdr45, Wt1, Zap70, Zbtb7, Zc3hdc1, Zfp36

## Cluster IIIA

0610041G09Rik, 1110030H18Rik, 1200009O22Rik, 1500031H04Rik, 1700018O18Rik, 1810009M01Rik, 2310016C16Rik, 2510009E07Rik, 2600011E07Rik, 2610020H15Rik, 2810003C17Rik, 2900093B09Rik, 3110004L20Rik, 4632425D07Rik, 6330403K07Rik, A830059I20Rik, Abat, Acta2, Actc1, Anxa3, Anxa5, Apcdd1, App, Astn1, AW121567, AW146242, B230104P22Rik, B2m, BC034054, BC039093, BC046404, Bin1, Bmp1, C130076O07Rik, Capn6, Car4, Carhsp1, Cbln1, Ccnd2, Cdk5r1, Cdkn1a, Cdkn1c, Chrna4, Chst1, Cklfsf3, Clic6, Cmtm8, Cntnap2, Col2a1, Col4a1, Col4a2, Col5a1, Crabp1, Crabp2, Cxcr4, D0H4S114, Dab2, Dbx1, Defcr-rs2, Dlk1, Dmrt2, Dpysl2, Dpysl4, Dpysl5, Dtx4, Ednra, Ednrb, Efnas5, Efnb1, Emid2, Eml1, Ephb1, Farp1, Fez1, Igfbp3, Flrt3, Flt1, G431001E03Rik, Gadd45g, Gap43, Gm1673, Gpr177, Gprin1, Hes5, Hmgn3, Igf2, Igfbp4, Igfbp5, Insm1, Irf2, Irs2, Irx2, Irx3, Irx5, Krt1-18, Krt2-8, Lbh, Lhfp, Lhx1, LOC381633, Lrrm1, Ly6h, Maged2, Magee1, Mapkapk2, Mbp, Meis1, Mest, Mfap2, Mfap4, Mic211, Mmd, Mrg1, Ndn, Nedd9, Nelf, Nkx6-1, Nnat, Nr2f1, Olfm1, Otx1, Parva, Pdzm3, Pea15, Pfn2, Phc2, Pkia, Pknox2, Pmp22, Podx12, Prnp, Ptn, Ptpd, Punc, Rab6b, RbmX, Reprimo, Rfx4, Rgma, Sall2, Scarf2, Sdc2, Sdc3, Sema3f, Sepn1, Sepw1, Serf1, Serpinh1, Shd, Shh, Slit2, Smarca2, Sox21, Sox9, Ssb4, Ssbp2, Sst, Stmn4, Syt11, T, Tcfap2b, Tdrd7, Timp2, Tmprss2, Tnfrsf19, Tnrc9, Trib2, Vim, Vtn, Zfp521, Zfp608, Zic1

## Cluster IIIB

1110003A17Rik, 1110007C05Rik, 1110012D08Rik, 1110014L17Rik, 1110038D17Rik, 1110063G11Rik, 1190017O12Rik, 1200013B22Rik, 1300002F13Rik, 1500003O03Rik, 1500011H22Rik, 1700019E19Rik, 1700021K19Rik, 1700023M03Rik, 1700025G04Rik, 1700088E04Rik, 1810007P19Rik, 1810009H17Rik, 1810010N17Rik, 1810011O10Rik, 1810021J13Rik, 1810037C20Rik, 1810057P16Rik, 1810073P09Rik, 2010011I20Rik, 2210417J20Rik, 2310003P10Rik, 2310015N21Rik, 2310021P13Rik, 2310041H06Rik, 2310045A20Rik, 2310067E08Rik, 2610110G12Rik, 2610203E10Rik, 2610524A10Rik, 2610528K11Rik, 2700055K07Rik, 2700083E18Rik, 2810022L02Rik, 2810413I22Rik, 2810427I04Rik, 2900046G09Rik, 3110018K12Rik, 3632413B07Rik, 3632451O06Rik, 4631426J05Rik, 4632417K02, 4833421E05Rik, 4930438M06Rik, 4930488P06Rik, 4930506D23Rik, 4932442K08Rik, 5430432M24Rik, 5830404H04Rik, 5830461H18Rik, 5930434B04Rik, 6030410K14Rik, 6330442E10Rik, 6330505N24Rik, 6430559E15Rik, 6720430O15, 8430427H17Rik, 9030205A07Rik, 9130005N14Rik, 9130213B05Rik, 9330132O05Rik, 9530068E07Rik, A230098A12Rik, A830020B06Rik, Aatk, Abca3, Abhd8, Acas2, Acta1, Actc1, Acvr1, Adcy2, Adcy6, AF322649, Ahi1, AI427515, AI591476, AI604832, AJ430384, Ak3, Akr1e1, Akt3, Alcam, Alg2, Als2cr2, Amfr, Angptl2, Ank2, Ank3, Ap3m2, Apbb1, Arg1, Arhgap24, Arid3a, Arl3, Arl4c, Arnt2, Ascl1, Asphd2, Atbf1, Atp6v0e2, Atp6v1g2, AU040320, AU040576, AW049604, AW456874, AW548124, AW822216, Axin2, Axl, B130050I23Rik, B230114P05Rik, B230312A22Rik, B230399E16Rik, B3gat1, B3gnt6, B430104H02Rik, B430218L07Rik, Bach2, Bag2, Bahd1, Bai2, BC006583, BC011468, BC019977, BC024955, BC025575, BC026432, BC026744, BC028975, BC030477, BC036718, BC046386, BC051244, BC063749, BC065120, BC067047, Bhlhb5, Bicc1, Bmp1, Bzrap1, C130086A10, C130099A20Rik, C230009H10Rik, C330023F11Rik, C630013N10Rik, C630113N10Rik, Cactn1g, Cactn1h, Cactn4, Cadps, Cadps2, Cald1, Capn2, Car14, Cart, Casp6, Catnd2, Cbx8, Cel27, Cd248, Cd40, Cd47, Cdh22, Cdkn1a, Ceacam1, Celsr1, Celsr2, CerK, Chrd, Chst2, Cib2, Ciz1, Cldn10, Clic1, Clip1, Clk3, Cmtm8, Col23a1, Col4a5, Commd3, Copz2, Cotl1, Cplx2, Cpne2, Cri1, Crmp1, Csf1, Ctdspl, Ctgf, Ctxn, Cuedc1, Cugbp2, Cutl1, Cx3cl1, Cxx1c, Cxxc4, Cyfip2, Cyp51, Cyr61, D030028O16Rik, D10Bwg0940e, D10Ucla1, D11Bwg0517e, D14Erd171e, D15Erd405e,

D2Bwg0891e, D2Bwg1356e, D330024H06Rik, D330037A14Rik, D430039N05Rik, D5ErtD593e, D630045E04Rik, D8ErtD82e, Dapk1, Dbn1, Dcx, Dcxr, Ddit4, Ddit4l, Ddrl, Defcr-rs7, Dp1, Dscr5, Dtx4, E130307J07Rik, E430021N18Rik, E430036I04Rik, Ebf2, Ebf3, Efh1, Efs, Ehb1, Elavl3, Epb4.1l3, Epha3, Ephb2, Ets1, Evl, F2r, F8a, Fbap7, Fads2, Fbln2, Fbn1, Fbxo36, Fgf15, Fgf8, Fgfbp3, Fgfr2, Fjx1, Flrt3, Fndc3b, Foxa1, Foa2, Foxb1, Foxc1, Frzb, Fstl1, Fzd1, Fzd10, Gabarap, Gadd45g, Gamt, Gdap1, Gdi1, Gdpd2, Ghr, Glt8d1, Gnai2, Gnas, Gnb4, Gnb5, Gng10, Gp38, Gpc1, Gpc2, Gpc3, Gpc4, Gpc6, Gpm6a, Gpr5, Gpsm1, Grb10, Grc10, Gria3, Griks5, Grina, Grip1, Gsc, Gsh1, Gstm5, Gyg1, H1f0, H2-Ab1, H2-Ke6, Haghl, Hdac7a, Heph, Hes6, Hey1, Hpcall1, Hrmt111, Hs3st3a1, Hsd11b2, Hspa5bp1, Hyal1, Hyal2, Id2, Idb4, Igf1r, Igfbp1l, Il18, Ilk, Inpp5e, Inpp5f, Itga3, Itm2a, Jmjd3, Jun, Kcnab2, Kctd10, Kctd12, Kif1b, Kif3c, Kif5c, Kirrel3, Klhdc2, Kns2, L3mbt13, Lbh, Lemd2, Leprel1, Letmd1, Lhfp, Lhfp12, Litaf, Lman2l, Lmo4, Lmx1a, Lmyc1, LOC245297, LOC278097, LOC381813, Lrfn3, Lrig1, Lrp12, Lrp4, Lrrc49, Lrrc4b, Lrrk1, Lsmp, Lsp1, Lxn, Lztr1, Lzts2, Maged1, Mapk8ip1, Mapk8ip2, Mapre2, Marcks, Mark1, Mdk, Megf10, Mest, Mfap2, Mgst1, Mic211, Mllt11, Mmp15, Mmp2, Mtap2, Mtch1, Mtrv2, Mycbpap, Myt1, Naglu, Nat6, Nav1, Ncald, Ncan, Nck2, Ncoa6, Ndst1, Nedd9, Nek9, Nelf, Nfil3, Nicn1, Nkx2-2, Nkx2-3, Nlgn2, Nme5, Nnat, Nog, Nope, Notch3, Npr2, Nr2f2, Nrp, Nrnx2, Nsg1, Nsg2, Nt5m, Ntng1, Ntrk2, Ntrk3, Nuak1, Nudt7, Oat, Olfm1, Olfm2, Olfm2b, Olfm3, Osbp16, Pacrg, Pacs1, Pak3, Palm, Pam, Papp3, Pard6g, Parp6, Pbx1, Pbx2, Pcdha6, Pcdhb2, Pcdhb3, Pcyox1, Peg3, Pftk1, Phf2, Phlda1, Pik3r1, Pitpnm2, Pitx2, Pjal1, Plekhh2, Plekhh2, Plxna2, Pon2, Ppapdc1, Ppp1r3c, Ppp1r9b, Prickle1, Prkcm, Prkd2, Prmt2, Ptpns1, Ptpna, Ptpnd, Ptx3, Purg, Rab11fip3, Rab13, Rab15, Rab38, Rab6ip1, Raet1b, Ramp2, Rasl10b, Rasl11b, Rassf4, Rbms1, Rbms3, Rbp1, Reep1, Reln, Rem2, Repin1, Rerg, Rgl1, Rgmb, Rgs16, Rgs17, Rgs4, Rhob, Rhod, Rhou, Rnf103, Rnf11, Ror2, Rshl2, Rsn, Rspo3, Rtn1, Rtn3, Rufy3, Rutbc2, Sat2, Sbk, Scand1, Scaras, Scd1, Scg3, Scrn1, Sdcbp, Sdk1, Selk, Sema3f, Sema6d, Sept3, sept5, Sept6, Sept8, Serinc2, Serpine2, Serpinf1, Sgne1, Sh3bp2, Shh, Siat10, Siat8b, Siat9, Six5, Slc22a17, Slc22a3, Slc27a3, Slc35c1, Slc39a6, Slc39a8, Sli1d2, Sli1d3, Sli1d4, Sli1d5, Sma3, Smo, Smpd1, Smpd3, Snrk, Sort1, Sox17, Sox21, Sox5, Sparc, Spg20, Spin2, Spon1, Srebp2, Srr, Ssbp3, St5, St6gal1, St7, Stambp, Stk39, Stx7, Stxbp1, Sulf1, Suv39h1, Syt11, Tagln3, Tax1bp3, Tbc1d5, Tceal1, Tceal5, Tcf12, Tcf7l2, Tcfap2b, Tcte1l, Tesk1, Tex27, Tgfb1l1, Tgfb2, Thbs3, Thns12, Timp3, Tm4sf12, Tm4sf6, Tm4sf8, Tmc7, Tmem136, Tmem43, Tmem53, Tmem66, Tmem9, Tmem9b, Tnfaip2, Tpbp, Tpm1, Tpm2, Traf1d1, Trc32, Trp53i11, Trp53inp2, Tsc22d3, Tspan7, Ttyh3, Tubb2b, Tulp4, Txndc13, Ube2e2, Ulk2, Unc5c, Uncx4.1, Usp11, Usp3, Vamp4, Vamp1, Vcml1, Vgll4, Vit, Vldlr, Wbp1, Wdr22, Wfcd1, Whrn, Wnt1, Wnt3a, Wnt5b, Wnt7a, Wnt8b, Xpr1, Zadh2, Zbtb5, Zc3hdc6, Zfhx1a, Zfp202, Zfp251, Zfp282, Zfp30, Zfp307, Zfp316, Zfp334, Zfp46, Zfp537, Zfp637, Zyx

## Cluster IV

0610007C21Rik, 0610031J06Rik, 1110003E01Rik, 1110007C02Rik, 1190002A17Rik, 1190007F08Rik, 1200006F02Rik, 1300010A20Rik, 1300010K09Rik, 1500004A08Rik, 1700027N10Rik, 1700047117Rik, 1810009B06Rik, 1810020D17Rik, 1810054O13Rik, 1810057E01Rik, 2210403B10Rik, 2300002D11Rik, 2310058J06Rik, 2310061N23Rik, 2310066E14Rik, 2600003E23Rik, 2600010E01Rik, 2610027C15Rik, 2610204M08Rik, 2610318I18Rik, 2700050C12Rik, 2810046M22Rik, 2810417M05Rik, 2900026H06Rik, 3110032G18Rik, 3222401M22Rik, 3830422N12Rik, 4631423F02Rik, 4922503N01Rik, 4930402H24Rik, 5230400G24Rik, 5730410E15Rik, 5730469M10Rik, 5730537D05Rik, 6430598A04Rik, 8430420C20Rik, 9030409G11Rik, 9630019K15Rik, A2bp1, A730017C20Rik, A930021H16Rik, AB182283, Abcg4, Abhd4, Acadl, Adamts4, Adck4, Add1, Adfp, Adra2a, Adssl1, AI450948, AI481100, AI481750, AI842396, Aig1, AL024069, Amdhd2, Amotl2, Ankrd56, Anxa1, Anxa2, Ap3b2, Apob48r, Arf3, Arf5, Arfgap3, Arl10b, Arpc1b, Atf3, Atp6v0a1, Atp6v0b, Atp9a, B230380D07Rik, B3gat3, B430119L13Rik, Bag3, Bai2, BC003324, BC016235, BC018242, BC019731, BC023957, BC025872, BC026370, BC026585, BC029214, BC031353, BC038286, BC051083, BC058638, BC061259, Bcl11a, Bcl11b, Bcl9l, Bhlhb2, Blec, Bmf, Bmp7, Bst2, Btbl14a, Btg1, C230075L19Rik, Cacnb3, Calu, Camk1, Car13, Car2, Caskin1, Cbaral, Cd151, Cd63, Cdc42ep5, Cdkn2a, Cdkn2b, Chgb, Chrb1, Chst5, Chst8, Cipp, Cited1, Cited2, Cited4, Cldn3, Cldn6, Cln3, Cln6, Cntn1, Col16a1, Colla2, Copz2, Cpxm1, Creb3, Creld1, Cryab, Cspr1, Cst3, Ctsz, Cul7, Cxcl1a, Cyba, D7Bwg0611e, Dab2, Dap, Dapk2, Dbp, Dcamk1l, Des, Dfy, Dhrr7, Diras1, Dlx1, Dmrt3, Dnaic1, Dnajb10, Dnajc12, Dner, Dok5, Dpysl3, Dscr11l, Dusp22, Dusp8, Dyrk1b, Dysf, E030006K04Rik, E130309F12Rik, Ecell1, Ecm1, Ednr, Efemp2, Efn5a, EG630499, Egfr, Elk3, Elov1l, Emp2, Emp3, En1, En2, Eno2, Eno3, Eps8l2, Fbln1, Fbxl12, Fbxo4, Fbxw4, Fezf2, Fgfbp1, Fhl2, Fkbp7, Foxc2, Foxd1, Foxq1, Frmd6, Furin, Fvt1, Gabarapl1, Gadd45b, Gal, Gata3, Gata6, Gats, Gba, Gbp2, Gdap1l1, Gdf10, Gdi1, Gipc1, Gipc2, Gja9, Gnao, Gnb2, Gng13, Gng8, Gns, Gpr124, Gpr137, Gpr146, Gprc5c, Gpx3, Grcc9, H13, H2-B1, H2-Q7, H2-T17, H2-T23, Hcrtr1, Hdac11, Hebp1, Hexa, Hint3, Hnt, Hoxa1, Hoxc6, Hrc, Hs3st1, Hspb2, Hspb8, Idb3, Ifngr2, Igf2r, Igfbp2, Igfbp3, Igsf11, Igtg, Ihpk1, Il11ra1, Ilvbl, Immp2l, Islr2, Itga5, Itgb5, Iptr2, Kcna5, Kcnmb4, Kif1a, Kifc2, Klhl6, Kremen, Krt1-19, Krt7, Lamp2, Laptm4a, Ldb2, Leprel2, Lgals1, Lhx5, Lmcd1, Lmo2, LOC212390, LOC268935, LOC381297, LOC381629, Loh11cr2a, Loxl1, Lrp1, Lrp10, Lrrc8a, Lrrfp1, Lrrn2, Lrrn3, Mab21l2, Map3k11, Mbp, Meox1, Mfge8, Mgat4b, MGC106740, MGC18837, Micall2, Mmp14, Mmp23, Mogat2, Mpra, Msx1, Msx2, Mxd4, Mxra8, Myadm, Myl1, Myl3, Naga, Nagk, Nenf, Neu1, Neurog2, Nfatc4, Npc2, Npdcl, Oaz2, Optn, ORF18, P2rx4, Pbxip1, Pdgfrl, Pdlim2, Pdlim3, Pdlim4, Prg2, Pga5, Pgm2, Phlda3, Pigf, Pla2g7, Plac1, Pld3, Plekha2, Plekha6, Plk2, Pltp, Podxl, Polg, Ppap2b, Ppic, Ppp3ca, Ppp3cc, Prckz, Prnd, Prss8, Prtn3, Psp, Psd2, Pthr1, Ptpro, Pttglip, Pvr12, Pxmp4, Pygb, Pygl, Pyy, Qscn6, Rab12, Rab3a, Rab7l1, Rabac1, Rabl, Rap2ip, Rassf3, Rbms2, Rcn3, Rftn2, Rgs3, Rhd14, Rhoc, Rhog, Rhoj, Rin3, Ripk4, Rit1, Rnf11, Rnf182, Rnf30, Rnpep1l, Rpe1l, Rragd, Rras, Rtn1, Rtn2, Rtn4r1l, S100a11, Scn3b, Scotin, Scube3, Scx, Sdsl, Sepp1, Sertad4, Sesn1, Sez6, Sez6l, Sfxn5, Sgpl1, Sh3d4, Std1, Sirt2, Slc13a4, Slc14a2, Slc17a6, Slc35a2, Slc38a5, Slc41a3, Slc4a2, Slc5a5, Slc7a8, Slc9a6, Soat1, Sp5, Spink3, Spint1, Spnbl1, Srdc10, Stmn3, Stmn4, Sv2a, Syn2, Syt1, Syt14l, Tacstd2, Tal2, Tapbp, Tbrg1, Tceal6, Tcfap2a, Tcigr1, Tcn2, Tes, Tex264, Tgfb2, Thbs2, Thra, Tmbim1, Tmc4, Tmed3, Tmem108, Tmem116, Tmem119, Tmem150, Tmem35, Tmem66, Tnfrsf10b, Tnfrsf12a, Tnfrsf1a, Tnfrsf5, Tnnc1, Tpcn1, Tpm2, Tpra40, Trim3, Trpc4ap, Trpt1, Ttyh1, Tubb4, Tulp1, Twist1, Twist2, Uap1l1, Ubc, Unc5b, Unc84b, Usp2, Vamp5, Vamp8, Vat1, Viaat, Wbscr24, Wip1, Wnt5a, Yipf3, Zcchc12, Zfp467, Zfpml1, Zic4

## Cluster V

0710005M24Rik, 1110032E23Rik, 1190002H23Rik, 1200009I06Rik, 1300007L22Rik, 1300014I06Rik, 1500015O10Rik, 1700084C01Rik, 1810015C04Rik, 2300002D11Rik, 2310043K02Rik, 2310047C17Rik, 2410080H04Rik, 2510004L01Rik, 2610001E17Rik, 2610109H07Rik, 4921520P21Rik, 4930422J18Rik, 5330414D10Rik, 5430431G03Rik, 5730453H04Rik, 8430408G22Rik, 9130211I03Rik, 9130213B05Rik, 9330140K16Rik, 9930017A07Rik, A630005A06Rik, AA467197, Acadl, Adcy8, Adra2b, Aebp1, AF067061, Afp, Ahnak, AI593442, Amn, Apoal1, Apod, Aqp1, Aqp4, Arhgap22, Arhgef6, Arid5b, Atp1a2, Atp1b2, Atp9a, Aurkc, B230342M21Rik, BC011209, BC040774, BC049816, BC055811, BC061212, BC080695, Bcan, Bet1l, Bgn, Bhmt2, Brdt, Bzrp1l, C130036G08, C1qtnf4, C2, Calb2, Camk2n1, Capzb, Car11, Cav1, Cxfa2t1h, Ccdc68, Cdh13, Cdo1, Cebp, Chodl, Chpt1, Cidea, Cldn11, Cldn23, Clu, Col1a1, Col3a1, Col6a1, Col6a2, Col9a2, Corin, Cox6a2, Crhb, Crim2, Crx, Crxos1, Csf1r, Csh2, Cspg5, Ctsb, Ctsc, Ctsh, Ctsj, Ctsr, Cxcl12, Cxcl16, Cygb, Cyp1b1, Cyp2d22, Cyp4f13, Cyp4v3, Cyp7b1, D12ErtD647e, D930010J01Rik, D9ErtD392e, Daf1, Dazl, Dcn, Ddit3, Diras2, Dkk3, Dkk1l, Dmkn, Dmrtc1a, Dmrtc1b, Dnaic1, Dox12, Dpep3, E130203B14Rik, Eef1a2, Egfr, Emcn, Enpp1, Enpp2, Enpp5, Entpd2, Eps8l2, Fapp3, Fas, Fbxo32, Fcgrt, Fgd6, Fibcd1, Flrt2, Fn3k, Fos, Foxf2, Fthfd, G1p2, Gad1, Gas6, Gata2, Gbp1, Gch1, Gcnt1, Gfap, Gja9, Gjb2, Gm2a, Gm428, Gm648, Gm691, Gpm6a, Gria2, Guca1a, Gypc, H2-gs17, H2-T23, Hic1, Hist1h1c, Hist1h2bc, Hmgcs2, Hoxb4, Hoxd8, Hpgd, Hspa2, Htra1, Ifit3, Igfbp6, Igfbp7, Il10rb, Irs3, Itga11, Itm2b, Kail1, Kcnc4, Kdelr3, Kdt1, Kngl1, Kng2, Lamp2, Lbp, Lcp1, Lgals3bp, Lgals6, Lgals9, Lgmn, Lims2, LOC240906, LOC270599, LOC333473, LOC433721, LOC434729, LOC547343, Lox, Ltbp3, Lum, Luzp2, Ly64, Mapt, Mnat4, Mbnl2, Meox2, Mfge8, Mglap, Mgl1, Mgst2, Mmd2, Mt3, Mx2, Myh8, Myl2, Myl4, Myo6, Nbl1, Ndrg1, Ndr1, Nfib, Nfix, Nid1, Nppb, Nrn1, Nrnx1, Nt5e, Nxf7, Oasl2, Ogn, Olfm1, Olig1, Osr2, OTTMUSG00000010537, P2ry14, Pdggf, Pdggfra, Pdzk1, Pink1, Plala, Pnck, Pold4, Pparg, Prepl, Prg, Prkar1b, Prosl1, Prxr1, Pscs, Pxl1, Pxl2, Pqct, Rab11fip5, Rabac1, Rappgef3, Rarb, Rarres2, Rasgrf1, Rbp4, Rgs9, Rin2, Rit2, Rnase1, Rnase4, Rora, Rspo2, Rusc2, Rxra, S100a1, S100a13, Sbsn, Scg2, Scrg1, Sct, Serpina3n,

Serpinb6b, Serpinb9e, Serpinb9f, Slc17a5, Slc17a8, Slc1a3, Slc23a3, Slc25a18, Slc2a13, Slc39a12, Slc40a1, Slc6a12, Slc6a13, Slco2a1, Slco4a1, Snca, Snx21, Sorbs1, Sostdc1, Sparc1, Sphk1, Spon2, Sspn, Stra8, Syp, Syt4, Taf7l, Tgfb1, Tgm2, Thbd, Thy1, Tinagl, Tlr2, Tmem92, Tnc, Tpcn1, Trpm6, Ttr, Tuft1, Ube1, Usp18, Usp29, Vdr, Wnt6, Ypel3, Zfp3613

**Figure S4: Listing and assignment of the genes graphed in figure 5**

All regulated genes were individually examined on the basis of the pertinent literature for identification of those involved in chromatin structure and epigenetic regulation. The genes were grouped into categories as indicated in the first column. Further functional information was added in the last column, where this was unambiguously available. Genes related to cell cycle, DNA replication and DNA repair were extracted from the relevant GO categories.

|             | cluster              | accession      | symbol           | comment                                          | Ref.                                                                    |    |
|-------------|----------------------|----------------|------------------|--------------------------------------------------|-------------------------------------------------------------------------|----|
| chromosome  | Ib                   | NM_001077712.1 | Stag2 (SA2)      | cohesin subunit                                  | 1                                                                       |    |
|             |                      | NM_021886.1    | Cenph            | kinetochor organization                          | 2                                                                       |    |
|             |                      | NM_009282.2    | Stag1 (SA1)      | cohesin subunit                                  | 1                                                                       |    |
|             |                      | NM_025795.2    | Ncaph2 (H2)      | condensin subunit                                | 1                                                                       |    |
|             |                      | NM_012039.1    | Zw10             | kinetochor organization                          | 4                                                                       |    |
|             |                      | NM_016692.1    | Incenp           | centromere protein                               | 2                                                                       |    |
|             |                      | NM_027263.1    | Apitd1 (Cenps)   | Kinetochor organization                          | 6                                                                       |    |
|             |                      | NM_019710.1    | Smc1a            | cohesin subunit                                  | 1                                                                       |    |
|             |                      | NM_027263.1    | Apitd1           | centromere protein                               |                                                                         |    |
|             |                      | NM_145924.2    | Cenpi            | centromere protein                               | 3                                                                       |    |
|             |                      | NM_025495.1    | Cenpp            | centromere protein                               | 6                                                                       |    |
|             |                      | XM_127861.2    | Cenpj            | centromere protein                               |                                                                         |    |
|             |                      | IIb            | NM_080470.1      | Smc1b                                            | cohesin subunit (meiosis)                                               | 1  |
|             | NM_016964.1          |                | Stag3 (SA3)      | cohesin subunit (meiosis)                        | 8                                                                       |    |
|             | heterochromatin      | Ib             | NM_001076789.1   | Cbx5 (HP1 alpha)                                 | heterochromatin structure                                               | 4  |
|             |                      |                | NM_172663.2      | Epc2                                             | enhancer of polycomb                                                    | 10 |
|             |                      |                | NM_025900.1      | Dek                                              |                                                                         | 11 |
|             |                      | IIa            | NM_007622.2      | Cbx1 (HP1 beta)                                  | heterochromatin structure                                               | 4  |
|             |                      |                | NM_009122        | Satb1                                            | x-inactivation<br>regulates ESC differentiation<br>and nanog expression | 12 |
| NM_010470.1 |                      |                | Hp1bp3           | heterochromatin protein 1,<br>binding protein 3  |                                                                         |    |
| euchromatin | Ia                   | NM_178017.1    | Hmgb2l1 (Hmgxb4) | HMG box domain<br>containing 4                   |                                                                         |    |
|             |                      | NM_016660.1    | Hmga1            | Highly expressed during<br>embryonic development | 5                                                                       |    |
|             |                      | NM_008252.2    | Hmgb2            |                                                  | 6                                                                       |    |
|             |                      | NM_016710.1    | Nsbp1            |                                                  | 7                                                                       |    |
|             |                      | NM_016957.3    | Hmgn2            |                                                  | 8                                                                       |    |
|             | IIIa                 | NM_175074.1    | Hmgn3            |                                                  | 8                                                                       |    |
|             | chromatin remodeling | Ia             | NM_009211.1      | Smrcc1 (BAF155)                                  | Component of esBAF                                                      | 17 |
| XM_132597.3 |                      |                | Smrccad1 (Etl1)  |                                                  | 9                                                                       |    |
|             |                      | NM_009530.1    | Atrx             | SNF2-related helicase,<br>Interneuronal survival | 19, 20                                                                  |    |
|             |                      | NM_009031.2    | Rbbp7 (Rbap46)   | Histone chaperone                                | 21                                                                      |    |
|             |                      | NM_001081267.1 | Rsf1             | Spacing factor                                   | 21, 22                                                                  |    |
|             |                      | NM_024184.1    | Asf1b            | nucleosome assembly                              | 21                                                                      |    |
|             |                      | NM_015781.2    | Nap1l1           | nucleosome assembly                              | 21, 23                                                                  |    |
|             |                      | NM_013733.2    | Chaf1a           | nucleosome assembly                              | 21                                                                      |    |
|             |                      | NM_025541.2    | Asf1a            | nucleosome assembly                              | 21                                                                      |    |



|                      |      |                |                               |                                                                          |                         |
|----------------------|------|----------------|-------------------------------|--------------------------------------------------------------------------|-------------------------|
|                      | IIa  | NM_020618.3    | Smarca1<br>(BAF57)            | SWI/SNF-related                                                          | 10                      |
|                      |      | NM_053123.3    | Smarca1<br>(Snf2L)            | SWI/SNF-related, specific<br>for postnatal neurons and in<br>adult brain | 25                      |
|                      | IIIa | NM_011416.2    | Smarca2<br>(brahma,<br>Snf2a) | SWI/SNF-related                                                          | 10                      |
| histone modification | IIIb | NM_133741.1    | Snrk                          | SNF-1 related kinase                                                     | 26                      |
|                      | Ia   | NM_011791.2    | Ash2l                         | H3K4Me                                                                   | 11                      |
|                      |      | NM_001035123.1 | Setd6                         | Set-domain containing<br>protein                                         |                         |
|                      |      | NM_021876.1    | Eed                           | H3K27Me                                                                  | 11                      |
|                      |      | NM_017479      | Myst4<br>(querkopf)           | histone acetyl transferase,<br>cerebral cortex development               | 28                      |
|                      |      | NM_173001.1    | Jmjd1a                        | H3K9Me1 and 2<br>demethylation                                           | 11                      |
|                      |      | NM_144787      | Jmjd2c                        | H3K36Me1, 2 and 3<br>demethylation                                       | 11                      |
|                      |      | NM_029441.1    | Cdyl2                         | chromodomain poetin                                                      | 29                      |
|                      |      | NM_009881      | Cdyl                          | chromodomain poetin                                                      | 29                      |
|                      |      | Ib             | NM_199196.1                   | Suz12                                                                    | PRC1 associated protein |
|                      |      | NM_007971.1    | Ezh2                          | K27Me3                                                                   | 11                      |
|                      |      | NM_008739      | Nsd1                          | H3K36Me, H4K20Me                                                         | 11                      |
|                      |      | NM_145414.1    | Nsun5                         | Putative methyltransferase                                               | 12                      |
|                      |      | NM_172567.1    | Mettl2                        | Putative methyltransferase                                               | 31                      |
|                      |      | NM_144918.1    | Smyd5                         | Putative methyltransferase,<br>Set-domain containing                     |                         |
|                      |      | NM_172545.1    | Ehmt1                         | H3K9Me2                                                                  | 11                      |
|                      |      | NM_133740.1    | Prmt3                         | arginine methylation                                                     | 32                      |
|                      |      | NM_145404.1    | BC006705<br>(PRMT7)           | arginine methylation                                                     | 13                      |
|                      |      | NM_178891.4    | Prmt6                         | H3R2Me2                                                                  | 14                      |
|                      |      | NM_007415.2    | Parp1                         | poly-(ADP-ribose)ation                                                   | 15                      |
|                      |      | NM_009483.1    | Utx                           | lysine demethylation,<br>H3K27Me                                         | 16                      |
|                      |      | NM_008228.1    | Hdac1                         | histone deacetylation                                                    | 17                      |
|                      |      | NM_019812.1    | Sirt1                         | histone deacetylation                                                    | 17                      |
|                      |      | NM_021788.1    | Sap30                         | histone deacetylation                                                    | 38                      |
|                      |      | NM_181586.2    | Sirt6                         | histone deacetylation                                                    | 17                      |
|                      |      | NM_177239.2    | Mysm1                         | histone de-ubiquitination                                                | 39                      |
|                      |      | NM_027432.3    | Wdr77<br>(MEP-50)             | interaction with H2A                                                     | 18                      |
|                      |      | NM_026539.1    | Chd11                         | chromodomain protein                                                     | 19                      |
|                      |      | NM_007690.1    | Chd1                          | chromodomain protein                                                     | 19                      |
|                      |      | NM_145125.1    | Brwd1                         | bromodomain protein                                                      | 20                      |
|                      | IIa  | NM_007552.3    | Bmi1                          | PRC complex                                                              | 4                       |
|                      |      | NM_080560.2    | Ube2n<br>(Ubc13)              | histone ubiquitination                                                   | 21                      |
|                      |      | NM_021554.2    | Mettl9                        | Methyl transferase like<br>protein                                       |                         |
|                      |      | NM_007623.2    | Cbx2 (Pc)                     | chromodomain protein,<br>H3K27Me3 binding                                | 9, 44                   |
|                      |      | NM_172605.2    | Tdrd3                         | tudor domain protein, binds<br>RMe2                                      | 45                      |
|                      |      | XM_131021.5    | Tdrkh                         | tudor domain protein                                                     | 46                      |
|                      | IIIa | NM_146142.1    | Tdrd7                         | tudor domain protein                                                     | 47                      |
|                      | IIIb | NM_011514.1    | Suv39h1                       | H3K9Me3                                                                  | 11                      |
|                      |      | NM_133182      | Hrmt111                       | Prmt2 variant 1                                                          | 48                      |

|          |                 |                |             |                                                                        |                  |    |
|----------|-----------------|----------------|-------------|------------------------------------------------------------------------|------------------|----|
|          |                 | NM_001077638.1 | Prmt2       | Prmt2 variant 2                                                        | 48               |    |
|          |                 | NM_001017426.1 | Jmjd3       | H3K27Me demethylase,<br>Required for neural<br>commitment              | 22               |    |
|          |                 | NM_019572.2    | Hdac7a      | histone deacetylation                                                  | 17               |    |
|          |                 | NM_013926.1    | Cbx8        | chromo domain protein;<br>PRC1 complex                                 | 9, 44            |    |
|          |                 | NM_001045523.1 | Bahd1       | bromo domain protein                                                   | 50               |    |
|          | IV              | NM_144919.1    | Hdac11      | histone deacetylation,<br>expressed during murine<br>brain development | 51               |    |
| histones | V               | NM_054054      | Brdt        | bromo domain protein                                                   | 52               |    |
|          | Ia              | NM_178187.2    | Hist1h2ae   | H2A consensus                                                          | 23               |    |
|          |                 | NM_175665.1    | Hist1h2bk   | histone H2B, S124A                                                     | 23               |    |
|          |                 | NM_178197.1    | Hist1h2bh   | H2B consensus                                                          | 23               |    |
|          |                 | NM_178204      | Hist1h3d    | H3.2                                                                   | 23               |    |
|          |                 | NM_178205.1    | Hist1h3e    | H3.2                                                                   | 23               |    |
|          |                 | NM_013550.3    | Hist1h3a    | H3.1                                                                   | 23               |    |
|          |                 | NM_178210.1    | Hist1h4j    | H4                                                                     | 23               |    |
|          |                 | NM_175656      | Hist1h4i    | H4                                                                     | 23               |    |
|          |                 | NM_175657.1    | Hist1h4m    | H4                                                                     | 23               |    |
|          |                 | NM_178211.1    | Hist1h4k    | H4                                                                     | 23               |    |
|          |                 | Ib             | NM_016750.1 | H2afz                                                                  | H2A variant H2AZ | 23 |
|          |                 |                | NM_175660.1 | Hist1h2ab                                                              | H2A consensus    | 23 |
|          |                 |                | NM_178186.2 | Hist1h2ag                                                              | H2A consensus    | 23 |
|          |                 |                | NM_178188.3 | Hist1h2ad                                                              | H2A consensus    | 23 |
|          |                 |                | NM_175653.1 | Hist1h3c                                                               | H3.1             | 23 |
|          |                 |                | NM_175655.1 | Hist1h4f                                                               | H4               | 23 |
|          |                 | IIa            | NM_198622.1 | H1fx                                                                   | H1.X             | 24 |
|          |                 | IIb            | NM_178198.1 | Hist1h2bj                                                              | H2B consensus    | 23 |
|          | DNA methylation | V              | NM_015786.1 | Hist1h1c                                                               | H1.2             | 24 |
|          |                 | NM_023422.1    | Hist1h2bc   | H2B; S75G                                                              | 23               |    |
| Ia       |                 | NM_019448.2    | Dnmt3l      | accessory Dnmt                                                         | 4                |    |
| Ib       |                 | NM_010068.1    | Dnmt3b      | de novo Dnmt                                                           | 4                |    |
|          |                 | NM_010066.2    | Dnmt1       | maintenance Dnmt                                                       | 4                |    |
|          |                 | NM_013595.1    | Mbd3        | binding to DNAMe                                                       | 4                |    |
| IIa      |                 | NM_010788.1    | Mecp2       | binding to DNAMe                                                       | 4                |    |

component of the Polycomb repressive complex (PRC), neuro-specific

1 Sumara I, *et al*, *J Cell Biol*, 151, 749-62, (2000), 2 Sugata N, *et al*, *J Biol Chem*, 274, 27343-6, (1999), 3 Losada A, *et al*, *Genes Dev*, 19, 1269-87, (2005), 4 Vallee RB, *et al*, *Cell Cycle*, 5, 2447-51, (2006), 5 Ruchaud S, *et al*, *Nat Rev Mol Cell Biol*, 8, 798-812, (2007), 6 Amano M, *et al*, *J Cell Biol*, 186, 173-82, (2009), 7 Amaro AC, *et al*, *Nat Cell Biol*, 12, 319-29, 8 Prieto I, *et al*, *Nat Cell Biol*, 3, 761-6, (2001), 9 Allis CD, Jenuwein, T., Reinberg, D. (2007) John Inglis, New York., 10 Stankunas K, *et al*, *Development*, 125, 4055-66, (1998), 11 Waldmann T, *et al*, *Gene*, 343, 1-9, (2004), 12 Savarese F, *et al*, *Genes Dev*, 23, 2625-38, (2009), 13 Cleynen I, *et al*, *Int J Oncol*, 32, 289-305, (2008), 14 Stros M, *Biochim Biophys Acta*, 1799, 101-13, 15 Rochman M, *et al*, *Biochim Biophys Acta*, 1799, 86-92, 16 West KL, *Biochem Soc Trans*, 32, 918-9, (2004), 17 Ho L, *et al*, *Proc Natl Acad Sci U S A*, 106, 5181-6, (2009), 18 Schoor M, *et al*, *Dev Dyn*, 197, 227-37, (1993), 19 Gibbons RJ, *et al*, *Hum Mutat*, 29, 796-802, (2008), 20 Medina CF, *et al*, *Hum Mol Genet*, 18, 966-77, (2009), 21 Loyola A, *et al*, *Biochim Biophys Acta*, 1677, 3-11, (2004), 22 Loyola A, *et al*, *Mol Cell Biol*, 23, 6759-68, (2003), 23 Zlatanova J, *et al*, *FASEB J*, 21, 1294-310, (2007), 24 Clapier CR, *et al*, *Annu Rev Biochem*, 78, 273-304, (2009), 25 Lazzaro MA, *et al*, *J Neurochem*, 77, 1145-56, (2001), 26 Kertesz N, *et al*, *Gene*, 294, 13-24, (2002), 27 Kouzarides T, *Cell*, 128, 693-705, (2007), 28 Thomas T, *et al*, *Development*, 127, 2537-48, (2000), 29 Fischle W, *et al*, *J Biol Chem*, 283, 19626-35, (2008), 30 Merla G, *et al*, *Hum Genet*, 110, 429-38, (2002), 31 Zhang SX, *et al*, *Gene*, 280, 135-44, (2001), 32 Tang J, *et al*, *J Biol Chem*, 273, 16935-45, (1998), 33 Miranda TB, *et al*, *J Biol Chem*, 279, 22902-7, (2004), 34 Guccione E, *et al*, *Nature*, (2007), 35 Rouleau M, *et al*, *J Cell Sci*, 117, 815-25, (2004), 36 Xu J, *et al*, *J Neurosci*, 28, 4521-7, (2008), 37 Yang XJ, *et al*, *Curr Opin Genet Dev*, 13, 143-53, (2003), 38 Zhang Y, *et al*, *Mol Cell*, 1, 1021-31, (1998), 39 Zhu P, *et al*, *Mol Cell*, 27, 609-21, (2007), 40 Furuno K, *et al*, *Biochem Biophys Res Commun*, 345, 1051-8, (2006), 41 Hall JA, *et al*, *Biochem Cell Biol*, 85, 463-76, (2007), 42 Huang H, *et al*, *Dev Dyn*, 227, 608-14, (2003), 43 Iijima K, *et al*, *J Radiat Res (Tokyo)*, 49, 451-64, (2008), 44 Bernstein E, *et al*, *Mol Cell Biol*, 26, 2560-9, (2006), 45 Cote J, *et al*, *J Biol Chem*, 280, 28476-83, (2005), 46 Chen C, *et al*, *Proc Natl Acad Sci U S A*, 106, 20336-41, (2009), 47 Hirose T, *et al*, *Eur J Biochem*, 267, 2113-21, (2000), 48 Scott HS, *et al*, *Genomics*, 48, 330-40, (1998), 49 Burgold T, *et al*, *PLoS ONE*, 3, e3034, (2008), 50 Biernie H, *et al*, *Proc Natl Acad Sci U S A*, 106, 13826-31, (2009), 51 Liu H, *et al*, *J Neurosci Res*, 86, 537-43, (2008), 52 Moriniere J, *et al*, *Nature*, 461, 664-8, (2009), 53 Marzluff WF, *et al*, *Genomics*, 80, 487-98, (2002), 54 Izzo A, *et al*, *Biol Chem*, 389, 333-43, (2008)

**Figure S5: Listing, assignment, and literature references of the genes graphed in figure 6D.**

The literature was searched for patterning-related genes (by function and/or expression). Those found to be regulated here were listed and assigned a role in forebrain, midbrain or hindbrain development (black boxes). The relevant literature sources are indicated. N.B.: sometimes functional importance (e.g. knockout phenotype) does not match the criteria for region markers and *vice versa*. Multiple regional assignments were allowed, where this was supported by the literature.

| Gene name | Accession number | Cluster | full name                                       | for-brain | mid-brain | hind-brain | literature         |
|-----------|------------------|---------|-------------------------------------------------|-----------|-----------|------------|--------------------|
| App       | NM_007471.1      | IIIa    | Amyloid beta (A4) precursor protein             | ■         |           |            | 52                 |
| Ascl1     | NM_008553.2      | IIIb    | Achaete-scute complex homolog 1                 |           |           | ■          | 9, 12, 58, 59      |
| Bcan      | NM_007529.1      | V       | Brevian                                         | ■         |           |            | 76                 |
| Bcl11b    | NM_021399        | V       | B-cell leukemia/lymphoma 11B                    | ■         |           |            | 4, 5, 6            |
| Calb2     | NM_007586.1      | V       | Calbindin 2                                     |           |           | ■          | 4, 38              |
| Chrd      | NM_009893.1      | IIIb    | Chordin                                         |           | ■         | ■          | 65                 |
| Cxcl12    | NM_001012477.1   | V       | Chemokine (C-X-C motif) ligand 12               | ■         |           |            | 72, 73, 74         |
| Dlx1      | NM_010053.1      | IV      | Distal-less homeobox 1                          | ■         |           |            | 1, 2, 3            |
| Egr2      | NM_010118.1      | Iia     | Early growth response 2                         |           |           | ■          | 31, 32             |
| En1       | NM_010133.1      | IV      | Engrailed 1                                     |           | ■         | ■          | 25, 27, 28         |
| En2       | NM_010134.1      | IV      | Engrailed 2                                     |           | ■         | ■          | 28, 29, 30         |
| Fabp7     | NM_021272.2      | IIIb    | Fatty acid binding protein 7, brain             | ■         |           | ■          | 53, 54             |
| Fez1      | NM_007586.1      | IIIa    | Fasciculation and elongation protein zeta 1     | ■         |           |            | 39                 |
| Fgf8      | NM_010205.1      | IIIb    | Fibroblast growth factor 8                      | ■         | ■         |            | 27, 29, 90, 91     |
| Fgfr2     | NM_201601.1      | IIIb    | Fibroblast growth factor receptor 2             | ■         | ■         |            | 49, 88             |
| Fgfr3     | NM_008010.2      | Iia     | Fibroblast growth factor receptor 3             | ■         | ■         |            | 48, 49             |
| Foxg1     | NM_008241.1      | Iia     | Forkhead box G1                                 | ■         |           |            | 9, 10              |
| Gata2     | NM_008090.3      | V       | GATA binding protein 2                          |           | ■         | ■          | 92, 93, 94         |
| Gli3      | NM_008130        | Iia     | GLI-Kruppel family member GLI3                  | ■         | ■         | ■          | 44, 45, 46, 47     |
| Hes3      | NM_008237.1      | Iia     | Hairy and enhancer of split 3                   | ■         | ■         |            | 18, 41, 43         |
| Hoxa1     | NM_010449.1      | IV      | Homeo box A1                                    |           |           | ■          | 36                 |
| Hoxa2     | NM_010451.1      | Iia     | Homeo box A2                                    |           |           | ■          | 33                 |
| Hoxb2     | NM_134032.1      | Iia     | Homeobox B2                                     |           |           | ■          | 20                 |
| Irx2      | NM_010574.2      | IIIa    | Iroquois related homeobox 2                     |           |           | ■          | 60, 62             |
| Irx3      | NM_008393        | IIIa    | Iroquois related homeobox 3                     |           | ■         | ■          | 60, 61             |
| Irx5      | NM_018826.2      | IIIa    | Iroquois related homeobox 5                     |           | ■         | ■          | 60, 61             |
| Isl1      | NM_021459.2      | Iia     | ISL1 transcription factor, LIM/homeodomain      | ■         |           |            | 9, 11, 12          |
| Lhx1      | NM_008498        | IIIa    | LIM homeobox protein 1                          |           |           | ■          | 12, 80             |
| Lhx5      | NM_008499.2      | IV      | LIM homeobox protein 5                          | ■         |           |            | 80                 |
| Lmx1a     | NM_033652.2      | IIIb    | LIM homeobox transcription factor 1 alpha       | ■         | ■         |            | 22, 23, 81, 82, 83 |
| Mecp2     | NM_010788.1      | Iia     | Methyl CpG binding protein 2                    | ■         | ■         | ■          | 68                 |
| Msx1      | NM_010835.1      | IV      | Homeobox, msh-like 1                            | ■         | ■         |            | 18, 22, 23, 24     |
| Ndst1     | NM_008306.2      | IIIb    | N-deacetylase/N-sulfotransferase 1              | ■         |           |            | 75                 |
| Neurog2   | NM_009718.2      | IV      | Neurogenin 2                                    | ■         | ■         | ■          | 12, 17, 18, 19     |
| Nfib      | NM_008687.2      | V       | Nuclear factor I/B                              | ■         | ■         | ■          | 55, 56, 57         |
| Nkx6-1    | NM_144955.1      | IIIa    | NK6 homeobox 1                                  |           | ■         | ■          | 22, 40, 41         |
| Nog       | NM_008711.1      | IIIb    | Noggin                                          | ■         |           | ■          | 65                 |
| Notch3    | NM_008716.1      | IIIb    | Notch gene homolog 3                            | ■         |           |            | 50, 51             |
| Nr2f1     | NM_010151.1      | IIIa    | Nuclear receptor subfamily 2, group F, member 1 | ■         |           |            | 13, 14, 15         |
| Nr2f2     | NM_183261.3      | IIIb    | Nuclear receptor subfamily 2, group F, member 2 | ■         |           | ■          | 14, 63, 64         |
| Nrg       | NM_178591.2      | Iia     | Neuregulin1                                     | ■         | ■         |            | 6, 79              |
| Otx1      | NM_011023.2      | IIIa    | Orthodenticle homolog 1                         | ■         | ■         |            | 20, 21             |
| Pitx2     | NM_011098.2      | IIIb    | paired-like homeodomain transcription factor 2  | ■         | ■         | ■          | 25, 89             |
| Ptx3      | NM_008987.2      | IIIb    | Pentraxin related gene                          | ■         | ■         |            | 25, 26             |
| Reln      | NM_011261        | IIIb    | Reelin                                          | ■         |           |            | 4, 16              |
| Rfx4      | NM_001024918.1   | IIIa    | Regulatory factor X, 4                          | ■         | ■         | ■          | 69, 70, 71         |
| Rora      | NM_013646.1      | V       | RAR-related orphan receptor alpha               | ■         |           | ■          | 34, 35             |
| Shh       | NM_009170        | IIIa    | Sonic hedgehog                                  | ■         | ■         | ■          | 4, 27              |
| Smo       | NM_176996.3      | Iia     | Smoothed homolog                                | ■         |           |            | 37                 |
| Sox5      | NM_011444.1      | IIIb    | SRY-box containing gene 5                       | ■         | ■         |            | 4, 7, 8            |
| Tal2      | NM_009317.2      | IV      | T-cell acute lymphocytic leukemia 2             | ■         | ■         | ■          | 12, 66, 67         |
| Tgfb2     | NM_009367        | IIIb    | Tgf-beta2                                       | ■         | ■         | ■          | 85, 86, 87         |
| Wnt1      | NM_021279.1      | IIIb    | Wingless-related MMTV integration site 1        | ■         | ■         | ■          | 22, 27             |
| Wnt3a     | NM_009522.1      | IIIb    | 3a/wingless-related MMTV integration site 3A    | ■         | ■         |            | 77, 78             |
| Wnt7a     | NM_009527.2      | IIIb    | Wingless-related MMTV integration site 7A       | ■         |           |            | 84                 |

**1** Andrews, G. L., *Mol Cell Neurosci* 23, 107-120, (2003); **2** Gaspard, N. *et al.*, *Nature* 455, 351-357, (2008); **3** Petryniak, M. A., *Neuron* 55, 417-433, (2007); **4** Gaspard, N. *et al.*, *Nat Protoc* 4, 1454-1463, (2009); **5** Leid, M. *et al.*, *Gene Expr Patterns* 4, 733-739, 2004; **6** Watanabe, K. *et al.*, *Nat Neurosci* 8, 288-296, (2005); **7** Chen, B. *et al.*, *Proc Natl Acad Sci U S A* 105, 11382-11387, (2008); **8** Lai, T. *et al.*, *Neuron* 57, 232-247, (2008); **9** Kwan, K. Y. *et al.*, *Proc Natl Acad Sci U S A* 105, (2008).; **10** Kinsler, R., *Synapse* 64, 169-171, 2010; **11** Elshatory, Y., *J Neurosci* 28, 3291-3297, (2008); **12** Abranches, E. *et al.*, *PLoS One* 4, (2009); **13** Faedo, A. *et al.*, *Cereb Cortex* 18, 2117-2131, (2008); **14** Qin, J. *et al.*, *Dev Dyn* 236, 810-820, (2007); **15** Studer, M., *Brain Res Bull* 66, 394-401, (2005); **16** Yamamoto, T., *Anat Sci Int* 84, 200-209, (2009); **17** Galichet, C., *Development* 135, 2031-2041, (2008); **18** Imayoshi, I., *Development* 135, 2531-2541, (2008); **19** Henke, R. M. *et al.*, *Development* 136, 2945-2954, (2009); **20** Hirth, F., *Bioessays* 21, 677-684, (1999); **21** Kurokawa, D. *et al.*, *Development* 131, 3319-3331, (2004); **22** Prakash, N., *J Physiol* 575, 403-410, (2006); **23** Andersson, E. *et al.*, *Cell* 124, 393-405, (2006); **24** Bach, A. *et al.*, *Development* 130, 4025-4036 (2003); **25** Barberi, T. *et al.*, *Nat Biotechnol* 21, 1200-1207, (2003); **26** Asbreuk, C. H., *Mol Cell Neurosci* 21, 410-420, (2002); **27** Lee, S. H., *Nat Biotechnol* 18, 675-679, (2000); **28** Simon, H. H., *Cell Tissue Res* 318, 53-61, (2004); **29** Bouchard, M. *et al.*, *Development* 132, 2633-2643, (2005); **30** Sillitoe, R. V., *J Neurosci* 28, (2008); **31** Wassef, M. A. *et al.*, *Development* 135, 3369-3378, (2008); **32** Desmazieres, A., *J Biol Chem* 284, 10831-10840, (2009); **33** Matis, C. *et al.*, *Dev Dyn* 236, 2675-2684, (2007); **34** Serinagaoglu, Y. *et al.*, *Mol Cell Neurosci* 34, 324-342, (2007); **35** Janmaat, S. *et al.*, *J Comp Neurol* 512, 467-477, (2009); **36** Gavalas, A., *Development* 130, 5663-5679, (2003); **37** Komada, M. *et al.*, *Development* 135, 2717-2727, (2008); **38** Niculescu, M. D., *FASEB J* 20, 43-49, (2006); **39** Hirata, T. *et al.*, *Development* 133, 3993-4004, (2006); **40** Prakash, N. *et al.*, *Development* 136, 2545-2555, (2009); **41** Liu, R. *et al.*, *Development* 130, 6221-6231, (2003); **42** Hatakeyama, J. *et al.*, *Development* 131, 5539-5550, (2004); **43** Hirata, H., *EMBO J* 20, 4454-4466, (2001); **44** Quinn, J. C., *Dev Biol* 327, 204-215, (2009); **45** Friedrichs, M., *Dev Biol* 318, 203-214, (2008); **46** Blaess, S., *Development* 135, 2093-2103, (2008); **47** Lebel, M., *Dev Biol* 302, 345-355, (2007); **48** Thomson, R. E. *et al.*, *Neural Dev* 4, 4, (2009); **49** Saarimaki-Vire, J. *et al.*, *J Neurosci* 27, 8581-8592, (2007); **50** Gaiano, N., *Neuron* 60, 189-191, (2008); **51** Dang, L., *Dev Neurosci* 28, 58-69, (2006).; **52** Hoe, H. S. *et al.*, *J Neurosci* 29, 7459-7473, (2009); **53** Gerstner, J. R. *et al.*, *PLoS One* 3, e1631, (2008); **54** Gerstner, J. R., *Neuroscience* 139, 1435-1448, (2006); **55** Plachez, C. *et al.*, *J Comp Neurol* 508, 385-401, (2008); **56** Campbell, C. E. *et al.*, *BMC Dev Biol* 8, 52, (2008); **57** Steele-Perkins, G. *et al.*, *Mol Cell Biol* 25, 685-698, (2005); **58** Jacob, J. *et al.*, *Development* 136, 2477-2485, (2009); **59** Pattyn, A. *et al.*, *Nat Neurosci* 7, 589-595, (2004); **60** Houweling, A. C. *et al.*, *Mech Dev* 107, 169-174, (2001); **61** Garriock, R. J., *Dev Genes Evol* 211, 257-260 (2001); **62** Lebel, M. *et al.*, *Mol Cell Biol* 23, (2003); **63** Tripodi, M., *Development* 131, 6119-6129, (2004); **64** Kim, B. J., *Dev Biol* 326, 378-391, (2009); **65** Anderson, R. M., *Development* 129, 4975-4987 (2002); **66** Bucher, K. *et al.*, *Dev Biol* 227, 533-544, (2000); **67** Mori, S. *et al.*, *Brain Res Mol Brain Res* 64, 199-210, (1999); **68** Ben-Shachar, S., *Hum Mol Genet* 18, 2431-2442, (2009); **69** Zhang, D. *et al.*, *J Neurochem* 98, 860-875, (2006); **70** Zarbalis, K. *et al.*, *PLoS Biol* 2, E219, (2004); **71** Zhang, D., *J Neurosci Res* 85, 3515-3522, (2007); **72** Li, G. *et al.*, *J Neurosci* 28, 1085-1098, (2008); **73** Luo, Y., *J Biol Chem* 283, 24789-24800, (2008); **74** Bhattacharyya, B. J. *et al.*, *J Neurosci* 28, 6720-6730, (2008); **75** Yabe, T., *Glycobiology* 15, 982-993, (2005); **76** Bekku, Y., *J Neurochem* 108, 1266-1276, (2009); **77** Louvi, A., *J Comp Neurol* 504, 550-569, (2007); **78** Castelo-Branco, G. *et al.*, *Proc Natl Acad Sci U S A* 100, 12747-12752, (2003); **79** Lopez-Bendito, G. *et al.*, *Cell* 125, 127-142, (2006); **80** Zhao, Y. *et al.*, *Proc Natl Acad Sci U S A* 104, 13182-13186, (2007); **81** Mishima, Y., *J Neurosci* 29, 11377-11384, (2009); **82** Lin, W. *et al.*, *Dev Biol* 333, 386-396, (2009); **83** Friling, S. *et al.*, *Proc Natl Acad Sci U S A* 106, 7613-7618, (2009); **84** Hirabayashi, Y. *et al.*, *Development* 131, 2791-2801, (2004); **85** Vogel, T., *Cereb Cortex* 20, 661-671, 2010; **86** Roussa, E. *et al.*, *Stem Cells* 24, 2120-2129, (2006); **87** Elvers, M., *Mech Dev* 122, 587-602, (2005); **88** Ever, L., *Dev Neurosci* 30, 306-318, (2008); **89** Martin, D. M. *et al.*, *Dev Biol* 267, 93-108, (2004); **90** Storm, E. E. *et al.*, *Development* 133, 1831-1844, (2006); **91** Ye, W. *et al.*, *Nat Neurosci* 4, 1175-1181, (2001); **92** Kala, K. *et al.*, *Development* 136, 253-262, (2009); **93** Zhou, Y., *Development* 127, 3829-3838 (2000); **94** Nardelli, J., *Dev Biol* 210, 305-321, (1999).

**Figure S6: Neuroteratogenic effects of Retinoic acid, Cyclopamine and Lead**

| compound                           | species             | Neuro-teratogenic effect                                                                                                                                            | Ref.     |
|------------------------------------|---------------------|---------------------------------------------------------------------------------------------------------------------------------------------------------------------|----------|
| all-trans<br>Retinoic acid<br>(RA) | Xenopus laevis      | microcephalic, anterior brain decreased,<br><i>hindbrain and spinal cord increased,</i><br><i>suppression of anterior CNS</i>                                       | 25,26    |
|                                    | Mesocicetus auratus | Spina bifida, microcephaly, exencephaly,<br>microcephaly                                                                                                            | 27       |
|                                    |                     | crebellum malformations                                                                                                                                             | 28       |
|                                    | Rattus norvegicus   | exencephaly, anencephaly, spina bifida                                                                                                                              | 29-31    |
|                                    | Mus musculus        | Spina bifida, exophthalmos, exencephaly,<br><i>truncation of the anterior brain</i>                                                                                 | 32,33    |
|                                    | Macaca mulatta      | microcephaly, hydrocephalus, vermus<br>abnormality                                                                                                                  | 27       |
|                                    | Homo sapiens*       | Hydrocephaly, <i>decline in size of forebrain<br/>regions</i>                                                                                                       | 28       |
| Cyclopamine                        | Gallus gallus       | cyclopia, fused telencephalon, defects in<br>midline patterning of the neural plate,<br><i>holoprosencephaly</i>                                                    | 34       |
|                                    | Sheep               | cyclopia                                                                                                                                                            | 35       |
|                                    | Rabbit              | cyclopia, cebocephalia                                                                                                                                              | 35       |
|                                    | Rattus norvegicus   | cebocephalia                                                                                                                                                        | 35,36    |
|                                    | Mus musculus        | Exencephaly, <i>holoprosencephaly</i>                                                                                                                               | 35       |
|                                    | Mesocicetus auratus | cebocephalia, exencephaly, encephalocele                                                                                                                            |          |
| Lead                               | Rattus norvegicus   | Size increase in mossy fibres and the granule<br>cell layer, inhibition of postnatal structuring,<br>reduced VACHT and ChAT mRNA levels,<br>increase in TH activity | 8,37-41  |
|                                    | Mus musculus        | Changes in the cholinergic system,<br>hyperactive behaviour                                                                                                         | 37       |
|                                    | Cavia porcellus     | Change in glutamate synthesis, reduced<br>glutamine synthetase activity                                                                                             | 37,42,43 |
|                                    | Monkeys             | Basal forebrain and primary visual cortex<br>damage, memory and learning defects,<br>impaired spatial tasks                                                         | 37,44    |
|                                    | Homo sapiens        | Increased distractability, attention deficit<br>disorder, decreased auditory sensitivity,<br>decreased visumotor performance                                        | 37,45,46 |
| Lead                               | disease correlation | Alzheimers disease <sup>47</sup> , Parkinsons disease <sup>48</sup> ,<br>Schizophrenia <sup>49</sup>                                                                |          |

\*: data for 13-*cis*-retinoic acid (Accutane<sup>®</sup>)

1. Losada, A and Hirano, T, (2005) Dynamic molecular linkers of the genome: the first decade of SMC proteins. *Genes Dev* 19: 1269-87.
2. Ruchaud, S, Carmena, M and Earnshaw, WC, (2007) Chromosomal passengers: conducting cell division. *Nat Rev Mol Cell Biol* 8: 798-812.
3. Amaro, AC, Samora, CP, Holtackers, R, Wang, E, Kingston, IJ, Alonso, M et al., Molecular control of kinetochore-microtubule dynamics and chromosome oscillations. *Nat Cell Biol* 12: 319-29.
4. Allis, CD, Jenuwein, T., Reinberg, D., (2007) *Epigenetics*. (John Inglis, New York).

5. Cleynen, I and Van de Ven, WJ, (2008) The HMGGA proteins: a myriad of functions (Review). *Int J Oncol* 32: 289-305.
6. Stros, M, HMGB proteins: interactions with DNA and chromatin. *Biochim Biophys Acta* 1799: 101-13.
7. Rochman, M, Malicet, C and Bustin, M, HMGN5/NSBP1: a new member of the HMGN protein family that affects chromatin structure and function. *Biochim Biophys Acta* 1799: 86-92.
8. Slomianka, L, Rungby, J, West, MJ, Danscher, G and Andersen, AH, (1989) Dose-dependent bimodal effect of low-level lead exposure on the developing hippocampal region of the rat: a volumetric study. *Neurotoxicology* 10: 177-90.
9. Schoor, M, Schuster-Gossler, K and Gossler, A, (1993) The Etl-1 gene encodes a nuclear protein differentially expressed during early mouse development. *Dev Dyn* 197: 227-37.
10. Clapier, CR and Cairns, BR, (2009) The biology of chromatin remodeling complexes. *Annu Rev Biochem* 78: 273-304.
11. Kouzarides, T, (2007) Chromatin modifications and their function. *Cell* 128: 693-705.
12. Merla, G, Ucla, C, Guipponi, M and Reymond, A, (2002) Identification of additional transcripts in the Williams-Beuren syndrome critical region. *Hum Genet* 110: 429-38.
13. Miranda, TB, Miranda, M, Frankel, A and Clarke, S, (2004) PRMT7 is a member of the protein arginine methyltransferase family with a distinct substrate specificity. *J Biol Chem* 279: 22902-7.
14. Guccione, E, Bassi, C, Casadio, F, Martinato, F, Cesaroni, M, Schuchlantz, H et al., (2007) Methylation of histone H3R2 by PRMT6 and H3K4 by an MLL complex are mutually exclusive. *Nature*.
15. Rouleau, M, Aubin, RA and Poirier, GG, (2004) Poly(ADP-ribosyl)ated chromatin domains: access granted. *J Cell Sci* 117: 815-25.
16. Xu, J, Deng, X, Watkins, R and Disteche, CM, (2008) Sex-specific differences in expression of histone demethylases Utx and Uty in mouse brain and neurons. *J Neurosci* 28: 4521-7.
17. Yang, XJ and Seto, E, (2003) Collaborative spirit of histone deacetylases in regulating chromatin structure and gene expression. *Curr Opin Genet Dev* 13: 143-53.
18. Furuno, K, Masatsugu, T, Sonoda, M, Sasazuki, T and Yamamoto, K, (2006) Association of Polycomb group SUZ12 with WD-repeat protein MEP50 that binds to histone H2A selectively in vitro. *Biochem Biophys Res Commun* 345: 1051-8.
19. Hall, JA and Georgel, PT, (2007) CHD proteins: a diverse family with strong ties. *Biochem Cell Biol* 85: 463-76.
20. Huang, H, Rambaldi, I, Daniels, E and Featherstone, M, (2003) Expression of the Wdr9 gene and protein products during mouse development. *Dev Dyn* 227: 608-14.
21. Iijima, K, Ohara, M, Seki, R and Tauchi, H, (2008) Dancing on damaged chromatin: functions of ATM and the RAD50/MRE11/NBS1 complex in cellular responses to DNA damage. *J Radiat Res (Tokyo)* 49: 451-64.
22. Burgold, T, Spreafico, F, De Santa, F, Totaro, MG, Prosperini, E, Natoli, G et al., (2008) The histone H3 lysine 27-specific demethylase Jmjd3 is required for neural commitment. *PLoS ONE* 3: e3034.
23. Marzluff, WF, Gongidi, P, Woods, KR, Jin, J and Maltais, LJ, (2002) The human and mouse replication-dependent histone genes. *Genomics* 80: 487-98.
24. Izzo, A, Kamieniarz, K and Schneider, R, (2008) The histone H1 family: specific members, specific functions? *Biol Chem* 389: 333-43.
25. Durston, AJ, Timmermans, JP, Hage, WJ, Hendriks, HF, de Vries, NJ, Heideveld, M et al., (1989) Retinoic acid causes an anteroposterior transformation in the developing central nervous system. *Nature* 340: 140-4.

26. Sive, HL, Draper, BW, Harland, RM and Weintraub, H, (1990) Identification of a retinoic acid-sensitive period during primary axis formation in *Xenopus laevis*. *Genes Dev* 4: 932-42.
27. Rosa, FW, Wilk, AL and Kelsey, FO, (1986) Teratogen update: vitamin A congeners. *Teratology* 33: 355-64.
28. McCaffery, PJ, Adams, J, Maden, M and Rosa-Molinar, E, (2003) Too much of a good thing: retinoic acid as an endogenous regulator of neural differentiation and exogenous teratogen. *Eur J Neurosci* 18: 457-72.
29. Holson, RR, Gazzara, RA, Ferguson, SA and Adams, J, (1997) A behavioral and neuroanatomical investigation of the lethality caused by gestational day 11-13 retinoic acid exposure. *Neurotoxicol Teratol* 19: 347-53.
30. Holson, RR, Gazzara, RA, Ferguson, SA and Adams, J, (1997) Behavioral effects of low-dose gestational day 11-13 retinoic acid exposure. *Neurotoxicol Teratol* 19: 355-62.
31. Kochhar, DM, (1967) Teratogenic activity of retinoic acid. *Acta Pathol Microbiol Scand* 70: 398-404.
32. Alles, AJ and Sulik, KK, (1990) Retinoic acid-induced spina bifida: evidence for a pathogenetic mechanism. *Development* 108: 73-81.
33. Collins, MD and Mao, GE, (1999) Teratology of retinoids. *Annu Rev Pharmacol Toxicol* 39: 399-430.
34. Cordero, D, Marcucio, R, Hu, D, Gaffield, W, Tapadia, M and Helms, JA, (2004) Temporal perturbations in sonic hedgehog signaling elicit the spectrum of holoprosencephaly phenotypes. *J Clin Invest* 114: 485-94.
35. Keeler, RF, (1978) Cycloamine and related steroidal alkaloid teratogens: their occurrence, structural relationship, and biologic effects. *Lipids* 13: 708-15.
36. Lipinski, RJ, Godin, EA, O'Leary-Moore, SK, Parnell, SE and Sulik, KK, Genesis of teratogen-induced holoprosencephaly in mice. *Am J Med Genet C Semin Med Genet* 154C: 29-42.
37. Finkelstein, Y, Markowitz, ME and Rosen, JF, (1998) Low-level lead-induced neurotoxicity in children: an update on central nervous system effects. *Brain Res Brain Res Rev* 27: 168-76.
38. Regan, CM, (1993) Neural cell adhesion molecules, neuronal development and lead toxicity. *Neurotoxicology* 14: 69-74.
39. Sun, X, Tian, X and Suszkiw, JB, (1997) Reduction of vesicular acetylcholine transporter mRNA in the rat septum following lead exposure. *Neuroreport* 8: 891-4.
40. Sun, X, Tian, X and Suszkiw, JB, (1997) Reduction of choline acetyltransferase mRNA in the septum of developing rat exposed to inorganic lead. *Neurotoxicology* 18: 201-7.
41. Bielarczyk, H, Tomsig, JL and Suszkiw, JB, (1994) Perinatal low-level lead exposure and the septo-hippocampal cholinergic system: selective reduction of muscarinic receptors and cholineacetyltransferase in the rat septum. *Brain Res* 643: 211-7.
42. Sierra, EM and Tiffany-Castiglioni, E, (1991) Reduction of glutamine synthetase activity in astroglia exposed in culture to low levels of inorganic lead. *Toxicology* 65: 295-304.
43. Sierra, EM, Rowles, TK, Martin, J, Bratton, GR, Womac, C and Tiffany-Castiglioni, E, (1989) Low level lead neurotoxicity in a pregnant guinea pigs model: neuroglial enzyme activities and brain trace metal concentrations. *Toxicology* 59: 81-96.
44. Reuhl, KR, Rice, DC, Gilbert, SG and Mallett, J, (1989) Effects of chronic developmental lead exposure on monkey neuroanatomy: visual system. *Toxicol Appl Pharmacol* 99: 501-9.
45. Otto, DA and Fox, DA, (1993) Auditory and visual dysfunction following lead exposure. *Neurotoxicology* 14: 191-207.

46. Schwartz, J and Otto, D, (1991) Lead and minor hearing impairment. *Arch Environ Health* 46: 300-5.
47. White, LD, Cory-Slechta, DA, Gilbert, ME, Tiffany-Castiglioni, E, Zawia, NH, Virgolini, M et al., (2007) New and evolving concepts in the neurotoxicology of lead. *Toxicol Appl Pharmacol* 225: 1-27.
48. Coon, S, Stark, A, Peterson, E, Gloi, A, Kortsha, G, Pounds, J et al., (2006) Whole-body lifetime occupational lead exposure and risk of Parkinson's disease. *Environ Health Perspect* 114: 1872-6.
49. Opler, MG, Buka, SL, Groeger, J, McKeague, I, Wei, C, Factor-Litvak, P et al., (2008) Prenatal exposure to lead, delta-aminolevulinic acid, and schizophrenia: further evidence. *Environ Health Perspect* 116: 1586-90.
